# Supplementary material for: Robust Detection of Hierarchical Communities from Escherichia coli Gene Expression Data
Source: PLoS Comput Biol. 2012 Feb 23;8(2):e1002391. doi: 10.1371/journal.pcbi.1002391 (PMC3285575; doi:10.1371/journal.pcbi.1002391)
Supplement: Dataset S1 — List of links in the E. coli CLR network at . The CLR algorithm is used to infer direct and indirect regulatory interactions between E. coli genes on the basis of the similarity of their expression response in 466 experiments. A matrix of relatedness values is calculated and a network of regulatory interactions is inferred by placing links between every pair of genes whose relatedness value exceeds some threshold, . A list of the links for the network at and is provided. Each link is given by listing a gene name, the gene's Blattner number, followed by the target gene name and Blattner number. (XLS) [file pcbi.1002391.s001.xls]

## Sheet: fmin=4
genename	bnumber	genename	bnumber
abgB	b1337	abgA	b1338
abgR	b1339	abgA	b1338
abgR	b1339	abgB	b1337
abgT	b1336	abgA	b1338
abgT	b1336	abgB	b1337
abgT	b1336	abgR	b1339
accB	b3255	accA	b185
accC	b3256	accA	b185
accC	b3256	accB	b3255
accD	b2316	accA	b185
accD	b2316	accB	b3255
aceB	b4014	aceA	b4015
aceF	b115	aceE	b114
aceK	b4016	aceA	b4015
aceK	b4016	aceB	b4014
ackA	b2296	aceE	b114
acrA	b463	accB	b3255
acrB	b462	accA	b185
acrB	b462	accC	b3256
acrB	b462	acrA	b463
acrD	b2470	acpH	b404
acs	b4069	aceA	b4015
acs	b4069	aceB	b4014
acs	b4069	aceK	b4016
actP	b4067	aceA	b4015
actP	b4067	aceB	b4014
actP	b4067	aceK	b4016
actP	b4067	acs	b4069
ada	b2213	acpH	b404
adhE	b1241	aas	b2836
adhP	b1478	aceA	b4015
adhP	b1478	aceB	b4014
adhP	b1478	acnA	b1276
adiC	b4115	adiA	b4117
adiY	b4116	adiA	b4117
adiY	b4116	adiC	b4115
adk	b474	accA	b185
adk	b474	accB	b3255
adk	b474	accC	b3256
adk	b474	accD	b2316
aegA	b2468	aaaD	b4634
aegA	b2468	abgA	b1338
aegA	b2468	abrB	b715
afuB	b263	acpH	b404
afuB	b263	acrD	b2470
afuC	b262	afuB	b263
agaC	b3139	agaB	b3138
agaD	b3140	agaB	b3138
agaD	b3140	agaC	b3139
agaI	b3141	agaB	b3138
agaI	b3141	agaD	b3140
agaS	b3136	agaA	b3135
agaS	b3136	agaD	b3140
agaV	b3133	agaA	b3135
agaV	b3133	agaS	b3136
agaW	b3134	agaA	b3135
agaW	b3134	agaC	b3139
agaW	b3134	agaD	b3140
agaW	b3134	agaV	b3133
agp	b1002	acs	b4069
agp	b1002	actP	b4067
aidB	b4187	acnA	b1276
alaS	b2697	accB	b3255
alaS	b2697	acrA	b463
alaS	b2697	acrB	b462
alaS	b2697	adk	b474
aldA	b1415	acs	b4069
aldA	b1415	actP	b4067
aldA	b1415	agp	b1002
aldB	b3588	aceK	b4016
aldB	b3588	acs	b4069
aldB	b3588	actP	b4067
aldB	b3588	adhP	b1478
aldB	b3588	agp	b1002
aldB	b3588	aldA	b1415
alkA	b2068	aaeB	b3240
alkA	b2068	abgA	b1338
alkA	b2068	abgB	b1337
alkA	b2068	ada	b2213
alkA	b2068	aegA	b2468
allA	b505	abgA	b1338
alr	b4053	aceA	b4015
alsB	b4088	agaV	b3133
alsB	b4088	alsA	b4087
alsC	b4086	agaA	b3135
alsC	b4086	agaV	b3133
alsC	b4086	alsA	b4087
alsC	b4086	alsB	b4088
alsE	b4085	alsA	b4087
alsE	b4085	alsB	b4088
alsE	b4085	alsC	b4086
alsK	b4084	alsC	b4086
alsK	b4084	alsE	b4085
amiB	b4169	acpT	b3475
amiD	b867	acnA	b1276
ampE	b111	ampD	b110
ampH	b376	amn	b1982
amyA	b1927	aceA	b4015
amyA	b1927	aceB	b4014
amyA	b1927	acnA	b1276
amyA	b1927	adhP	b1478
amyA	b1927	aldB	b3588
anmK	b1640	abgA	b1338
anmK	b1640	abgB	b1337
anmK	b1640	abgR	b1339
anmK	b1640	abgT	b1336
anmK	b1640	alkA	b2068
ansA	b1767	accB	b3255
apaH	b49	ampD	b110
apaH	b49	ampE	b111
apaH	b49	apaG	b50
appB	b979	acrR	b464
appB	b979	appA	b980
appC	b978	aidB	b4187
appC	b978	appA	b980
appC	b978	appB	b979
appY	b564	alx	b3088
apt	b469	accA	b185
apt	b469	accB	b3255
apt	b469	accC	b3256
araA	b62	abgR	b1339
araB	b63	abgR	b1339
araB	b63	abgT	b1336
araB	b63	araA	b62
araC	b64	araA	b62
araC	b64	araB	b63
araD	b61	abgB	b1337
araD	b61	abgR	b1339
araD	b61	abgT	b1336
araD	b61	araA	b62
araD	b61	araB	b63
araD	b61	araC	b64
araE	b2841	abgR	b1339
araE	b2841	araA	b62
araE	b2841	araB	b63
araE	b2841	araC	b64
araE	b2841	araD	b61
araF	b1901	araA	b62
araF	b1901	araB	b63
araF	b1901	araC	b64
araF	b1901	araD	b61
araF	b1901	araE	b2841
araG	b1900	araA	b62
araG	b1900	araB	b63
araG	b1900	araC	b64
araG	b1900	araD	b61
araG	b1900	araE	b2841
araG	b1900	araF	b1901
araH	b4460	araA	b62
araH	b4460	araB	b63
araH	b4460	araC	b64
araH	b4460	araD	b61
araH	b4460	araE	b2841
araH	b4460	araF	b1901
araH	b4460	araG	b1900
araJ	b396	abgR	b1339
araJ	b396	araA	b62
araJ	b396	araB	b63
araJ	b396	araC	b64
araJ	b396	araD	b61
araJ	b396	araE	b2841
araJ	b396	araF	b1901
araJ	b396	araG	b1900
araJ	b396	araH	b4460
argB	b3959	argA	b2818
argC	b3958	argA	b2818
argC	b3958	argB	b3959
argD	b3359	argA	b2818
argD	b3359	argB	b3959
argD	b3359	argC	b3958
argE	b3957	argA	b2818
argE	b3957	argB	b3959
argE	b3957	argC	b3958
argE	b3957	argD	b3359
argF	b273	argA	b2818
argF	b273	argB	b3959
argF	b273	argC	b3958
argF	b273	argD	b3359
argF	b273	argE	b3957
argG	b3172	argA	b2818
argG	b3172	argB	b3959
argG	b3172	argC	b3958
argG	b3172	argD	b3359
argG	b3172	argE	b3957
argG	b3172	argF	b273
argH	b3960	argA	b2818
argH	b3960	argB	b3959
argH	b3960	argC	b3958
argH	b3960	argD	b3359
argH	b3960	argE	b3957
argH	b3960	argF	b273
argH	b3960	argG	b3172
argI	b4254	argA	b2818
argI	b4254	argB	b3959
argI	b4254	argC	b3958
argI	b4254	argD	b3359
argI	b4254	argE	b3957
argI	b4254	argF	b273
argI	b4254	argG	b3172
argI	b4254	argH	b3960
argK	b2918	agaA	b3135
argK	b2918	agaB	b3138
argK	b2918	agaD	b3140
argK	b2918	agaI	b3141
argP	b2916	argE	b3957
argS	b1876	ansA	b1767
argS	b1876	apbE	b2214
argS	b1876	apt	b469
argT	b2310	aceA	b4015
argT	b2310	aceB	b4014
argT	b2310	ackA	b2296
argT	b2310	acs	b4069
argT	b2310	adiY	b4116
argT	b2310	aldA	b1415
argW	b2348	argU	b536
argX	b3796	argU	b536
argX	b3796	argW	b2348
ariR	b1166	adhP	b1478
arnA	b2255	ais	b2252
arnB	b2253	ais	b2252
arnB	b2253	argB	b3959
arnB	b2253	argC	b3958
arnB	b2253	argH	b3960
arnB	b2253	arnA	b2255
arnC	b2254	ais	b2252
arnC	b2254	argB	b3959
arnC	b2254	argC	b3958
arnC	b2254	arnA	b2255
arnC	b2254	arnB	b2253
arnD	b2256	ais	b2252
arnD	b2256	alkA	b2068
arnD	b2256	arnA	b2255
arnD	b2256	arnB	b2253
arnD	b2256	arnC	b2254
arnF	b2258	arnD	b2256
arnT	b2257	arnA	b2255
arnT	b2257	arnB	b2253
arnT	b2257	arnC	b2254
arnT	b2257	arnD	b2256
arnT	b2257	arnF	b2258
aroA	b908	argA	b2818
aroA	b908	argB	b3959
aroA	b908	argC	b3958
aroA	b908	argD	b3359
aroA	b908	argE	b3957
aroA	b908	argF	b273
aroA	b908	argG	b3172
aroA	b908	argI	b4254
aroB	b3389	accB	b3255
aroB	b3389	acrA	b463
aroB	b3389	amiB	b4169
aroC	b2329	accB	b3255
aroC	b2329	acrA	b463
aroD	b1693	amn	b1982
aroD	b1693	argE	b3957
aroD	b1693	argG	b3172
aroD	b1693	argI	b4254
aroD	b1693	aroA	b908
aroE	b3281	aroB	b3389
aroF	b2601	argC	b3958
aroF	b2601	argD	b3359
aroF	b2601	argE	b3957
aroF	b2601	aroA	b908
aroG	b754	argA	b2818
aroG	b754	argB	b3959
aroG	b754	argC	b3958
aroG	b754	argD	b3359
aroG	b754	argE	b3957
aroG	b754	argF	b273
aroG	b754	argG	b3172
aroG	b754	argI	b4254
aroG	b754	aroA	b908
aroG	b754	aroD	b1693
aroH	b1704	aroA	b908
aroH	b1704	aroD	b1693
aroK	b3390	accB	b3255
aroK	b3390	acrA	b463
aroK	b3390	apt	b469
aroK	b3390	aroB	b3389
aroL	b388	aroF	b2601
aroM	b390	aroF	b2601
aroP	b112	argA	b2818
aroP	b112	argB	b3959
aroP	b112	argC	b3958
aroP	b112	argD	b3359
aroP	b112	argE	b3957
aroP	b112	argF	b273
aroP	b112	argG	b3172
aroP	b112	argH	b3960
aroP	b112	argI	b4254
aroP	b112	aroA	b908
aroP	b112	aroD	b1693
aroP	b112	aroF	b2601
aroP	b112	aroG	b754
arpA	b4017	acrF	b3266
arpA	b4017	agaB	b3138
arrQ	b1554	ansP	b1453
arsC	b3503	arsB	b3502
arsR	b3501	agaC	b3139
arsR	b3501	agaD	b3140
arsR	b3501	agaI	b3141
artI	b863	aceA	b4015
artI	b863	amyA	b1927
artJ	b860	argA	b2818
artJ	b860	argB	b3959
artJ	b860	argC	b3958
artJ	b860	argD	b3359
artJ	b860	argE	b3957
artJ	b860	argF	b273
artJ	b860	argG	b3172
artJ	b860	argH	b3960
artJ	b860	argI	b4254
artJ	b860	aroA	b908
artJ	b860	aroD	b1693
artJ	b860	aroG	b754
artJ	b860	aroP	b112
artM	b861	artI	b863
artP	b864	artI	b863
artP	b864	artM	b861
artQ	b862	artI	b863
artQ	b862	artM	b861
artQ	b862	artP	b864
ascB	b2716	aaeB	b3240
ascB	b2716	arnE	b4544
ascF	b2715	afuC	b262
asd	b3433	amn	b1982
asd	b3433	ampD	b110
asd	b3433	apaH	b49
asd	b3433	argA	b2818
asd	b3433	argE	b3957
asd	b3433	argG	b3172
asd	b3433	argP	b2916
asd	b3433	aroA	b908
asd	b3433	aroD	b1693
asd	b3433	aroG	b754
asd	b3433	aroP	b112
asnB	b674	argF	b273
asnB	b674	aroG	b754
asnB	b674	asd	b3433
asnS	b930	aroH	b1704
aspA	b4139	ansB	b2957
aspA	b4139	aphA	b4055
aspA	b4139	araC	b64
aspC	b928	acnB	b118
aspC	b928	amn	b1982
aspC	b928	aroA	b908
aspC	b928	aroD	b1693
aspC	b928	aroG	b754
aspC	b928	aroP	b112
aspC	b928	asd	b3433
aspS	b1866	ahpF	b606
aspS	b1866	ansA	b1767
aspS	b1866	argS	b1876
astA	b1747	acnA	b1276
astA	b1747	acs	b4069
astA	b1747	adhP	b1478
astA	b1747	aldB	b3588
astA	b1747	argT	b2310
astA	b1747	ariR	b1166
astB	b1745	acnA	b1276
astB	b1745	acs	b4069
astB	b1745	actP	b4067
astB	b1745	adhP	b1478
astB	b1745	aldA	b1415
astB	b1745	aldB	b3588
astB	b1745	argT	b2310
astB	b1745	ariR	b1166
astB	b1745	astA	b1747
astC	b1748	aceA	b4015
astC	b1748	aceB	b4014
astC	b1748	acs	b4069
astC	b1748	actP	b4067
astC	b1748	adhP	b1478
astC	b1748	aldA	b1415
astC	b1748	aldB	b3588
astC	b1748	argT	b2310
astC	b1748	ariR	b1166
astC	b1748	astA	b1747
astC	b1748	astB	b1745
astD	b1746	acnA	b1276
astD	b1746	acs	b4069
astD	b1746	adhP	b1478
astD	b1746	aldB	b3588
astD	b1746	argT	b2310
astD	b1746	ariR	b1166
astD	b1746	astA	b1747
astD	b1746	astB	b1745
astD	b1746	astC	b1748
astE	b1744	abgA	b1338
astE	b1744	abgB	b1337
astE	b1744	abgR	b1339
astE	b1744	acnA	b1276
astE	b1744	adhP	b1478
astE	b1744	alkA	b2068
astE	b1744	astA	b1747
astE	b1744	astB	b1745
astE	b1744	astC	b1748
astE	b1744	astD	b1746
atoB	b2224	atoA	b2222
atoC	b2220	agp	b1002
atoC	b2220	alkA	b2068
atoE	b2223	atoB	b2224
atoS	b2219	agp	b1002
atoS	b2219	atoC	b2220
atpA	b3734	accB	b3255
atpA	b3734	accC	b3256
atpA	b3734	aceE	b114
atpA	b3734	aceF	b115
atpA	b3734	acrA	b463
atpA	b3734	adk	b474
atpA	b3734	alaS	b2697
atpB	b3738	accA	b185
atpB	b3738	accB	b3255
atpB	b3738	accC	b3256
atpB	b3738	adk	b474
atpB	b3738	aroK	b3390
atpB	b3738	atpA	b3734
atpC	b3731	accB	b3255
atpC	b3731	accC	b3256
atpC	b3731	alaS	b2697
atpC	b3731	atpA	b3734
atpC	b3731	atpB	b3738
atpD	b3732	accB	b3255
atpD	b3732	accC	b3256
atpD	b3732	aceE	b114
atpD	b3732	aceF	b115
atpD	b3732	acrB	b462
atpD	b3732	adk	b474
atpD	b3732	alaS	b2697
atpD	b3732	atpA	b3734
atpD	b3732	atpB	b3738
atpD	b3732	atpC	b3731
atpE	b3737	accB	b3255
atpE	b3737	accC	b3256
atpE	b3737	adk	b474
atpE	b3737	atpA	b3734
atpE	b3737	atpB	b3738
atpE	b3737	atpC	b3731
atpE	b3737	atpD	b3732
atpF	b3736	accB	b3255
atpF	b3736	accC	b3256
atpF	b3736	adk	b474
atpF	b3736	atpA	b3734
atpF	b3736	atpB	b3738
atpF	b3736	atpC	b3731
atpF	b3736	atpD	b3732
atpF	b3736	atpE	b3737
atpG	b3733	accB	b3255
atpG	b3733	accC	b3256
atpG	b3733	aceE	b114
atpG	b3733	aceF	b115
atpG	b3733	acrA	b463
atpG	b3733	adk	b474
atpG	b3733	alaS	b2697
atpG	b3733	atpA	b3734
atpG	b3733	atpB	b3738
atpG	b3733	atpC	b3731
atpG	b3733	atpD	b3732
atpG	b3733	atpE	b3737
atpG	b3733	atpF	b3736
atpH	b3735	accB	b3255
atpH	b3735	accC	b3256
atpH	b3735	adk	b474
atpH	b3735	atpA	b3734
atpH	b3735	atpB	b3738
atpH	b3735	atpC	b3731
atpH	b3735	atpD	b3732
atpH	b3735	atpE	b3737
atpH	b3735	atpF	b3736
atpH	b3735	atpG	b3733
atpI	b3739	accB	b3255
atpI	b3739	adk	b474
atpI	b3739	apt	b469
atpI	b3739	argR	b3237
atpI	b3739	aroK	b3390
atpI	b3739	atpA	b3734
atpI	b3739	atpB	b3738
atpI	b3739	atpE	b3737
atpI	b3739	atpF	b3736
atpI	b3739	atpH	b3735
avtA	b3572	aroA	b908
azoR	b1412	aroD	b1693
azoR	b1412	aroH	b1704
bacA	b3057	apt	b469
baeS	b2078	abgA	b1338
baeS	b2078	abgB	b1337
baeS	b2078	alkA	b2068
bamA	b177	aceE	b114
bamA	b177	aceF	b115
bamA	b177	acrB	b462
bamA	b177	alaS	b2697
bamA	b177	apaG	b50
bamC	b2477	accA	b185
bamC	b2477	accB	b3255
bamC	b2477	accD	b2316
bamC	b2477	adk	b474
bamD	b2595	accB	b3255
bamD	b2595	accC	b3256
bamD	b2595	acpS	b2563
bamD	b2595	acrA	b463
bamD	b2595	adk	b474
bamD	b2595	alaS	b2697
bamD	b2595	ansA	b1767
bamD	b2595	aroC	b2329
bamD	b2595	aroK	b3390
bamD	b2595	atpA	b3734
bamD	b2595	atpB	b3738
bamD	b2595	atpD	b3732
bamD	b2595	atpE	b3737
bamD	b2595	atpF	b3736
bamD	b2595	atpG	b3733
bamD	b2595	atpH	b3735
barA	b2786	ampC	b4150
basR	b4113	ais	b2252
basR	b4113	argE	b3957
basR	b4113	arnA	b2255
basR	b4113	arnB	b2253
basR	b4113	arnC	b2254
basR	b4113	arnD	b2256
basS	b4112	ais	b2252
basS	b4112	argC	b3958
basS	b4112	arnA	b2255
basS	b4112	arnB	b2253
basS	b4112	arnC	b2254
basS	b4112	arnD	b2256
basS	b4112	arnT	b2257
basS	b4112	basR	b4113
bcp	b2480	adk	b474
bcp	b2480	atpH	b3735
bcp	b2480	bamD	b2595
bcr	b2182	aroH	b1704
bcr	b2182	asnS	b930
bcsA	b3533	agaC	b3139
bcsA	b3533	agaD	b3140
bcsA	b3533	agaI	b3141
bcsA	b3533	argK	b2918
bcsA	b3533	arsR	b3501
bcsB	b3532	agaB	b3138
bcsB	b3532	agaC	b3139
bcsB	b3532	agaD	b3140
bcsB	b3532	agaI	b3141
bcsB	b3532	agaS	b3136
bcsB	b3532	argK	b2918
bcsB	b3532	arsR	b3501
bcsB	b3532	bcsA	b3533
bcsC	b3530	aidB	b4187
bcsC	b3530	argS	b1876
bcsF	b3537	bcsE	b3536
bcsG	b3538	bcsE	b3536
bcsG	b3538	bcsF	b3537
bcsZ	b3531	aaeB	b3240
bcsZ	b3531	ade	b3665
bcsZ	b3531	asnA	b3744
bcsZ	b3531	bcsA	b3533
bcsZ	b3531	bcsB	b3532
bdm	b1481	adhP	b1478
betB	b312	amiB	b4169
betB	b312	betA	b311
betI	b313	betA	b311
betI	b313	betB	b312
betT	b314	betA	b311
betT	b314	betB	b312
betT	b314	betI	b313
bfd	b3337	ansB	b2957
bfr	b3336	aidB	b4187
bfr	b3336	amyA	b1927
bfr	b3336	bcsC	b3530
bglA	b2901	atpA	b3734
bglB	b3721	acrF	b3266
bglB	b3721	adiA	b4117
bglB	b3721	alsB	b4088
bglB	b3721	alsE	b4085
bglB	b3721	arpA	b4017
bglB	b3721	aslA	b3801
bglF	b3722	agaW	b3134
bglF	b3722	bglB	b3721
bglG	b3723	acrF	b3266
bglG	b3723	adiA	b4117
bglG	b3723	alsE	b4085
bglG	b3723	arpA	b4017
bglG	b3723	aslA	b3801
bglG	b3723	bglB	b3721
bglH	b3720	aslB	b3800
bglH	b3720	bglB	b3721
bglH	b3720	bglF	b3722
bglH	b3720	bglG	b3723
bglJ	b4366	bglB	b3721
bglJ	b4366	bglG	b3723
bglX	b2132	ampH	b376
bglX	b2132	ansA	b1767
bglX	b2132	asmA	b2064
bioA	b774	alkA	b2068
bioA	b774	baeS	b2078
bioB	b775	amtB	b451
bioB	b775	argA	b2818
bioB	b775	argB	b3959
bioB	b775	argC	b3958
bioB	b775	argD	b3359
bioB	b775	argF	b273
bioB	b775	argG	b3172
bioB	b775	argH	b3960
bioB	b775	argI	b4254
bioB	b775	aroA	b908
bioB	b775	aroD	b1693
bioB	b775	aroF	b2601
bioB	b775	aroP	b112
bioB	b775	artJ	b860
bioC	b777	argA	b2818
bioC	b777	argB	b3959
bioC	b777	argC	b3958
bioC	b777	argD	b3359
bioC	b777	argF	b273
bioC	b777	argG	b3172
bioC	b777	argI	b4254
bioC	b777	aroH	b1704
bioC	b777	aroP	b112
bioC	b777	artJ	b860
bioC	b777	asnB	b674
bioC	b777	baeS	b2078
bioC	b777	bioA	b774
bioC	b777	bioB	b775
bioD	b778	argA	b2818
bioD	b778	argB	b3959
bioD	b778	argC	b3958
bioD	b778	argD	b3359
bioD	b778	argF	b273
bioD	b778	argG	b3172
bioD	b778	argH	b3960
bioD	b778	argI	b4254
bioD	b778	aroA	b908
bioD	b778	aroG	b754
bioD	b778	aroP	b112
bioD	b778	artJ	b860
bioD	b778	bioB	b775
bioD	b778	bioC	b777
bioF	b776	afuB	b263
bioF	b776	amtB	b451
bioF	b776	argA	b2818
bioF	b776	argB	b3959
bioF	b776	argC	b3958
bioF	b776	argD	b3359
bioF	b776	argF	b273
bioF	b776	argG	b3172
bioF	b776	argH	b3960
bioF	b776	aroP	b112
bioF	b776	artJ	b860
bioF	b776	asnB	b674
bioF	b776	bioA	b774
bioF	b776	bioB	b775
bioF	b776	bioC	b777
bioF	b776	bioD	b778
bioH	b3412	alx	b3088
bioH	b3412	ampC	b4150
bioH	b3412	aslB	b3800
birA	b3973	acnA	b1276
birA	b3973	alx	b3088
birA	b3973	ampC	b4150
birA	b3973	barA	b2786
birA	b3973	bioH	b3412
blc	b4149	aldB	b3588
blc	b4149	amyA	b1927
blc	b4149	bcsC	b3530
blc	b4149	bfr	b3336
bolA	b435	arcA	b4401
bolA	b435	bfr	b3336
bolA	b435	blc	b4149
borD	b557	accB	b3255
borD	b557	acrR	b464
borD	b557	apt	b469
brnQ	b401	apt	b469
btuB	b3966	accC	b3256
btuB	b3966	atpB	b3738
btuB	b3966	atpC	b3731
btuB	b3966	atpD	b3732
btuB	b3966	atpE	b3737
btuB	b3966	atpH	b3735
btuC	b1711	aslA	b3801
btuC	b1711	bcr	b2182
btuC	b1711	bglX	b2132
btuD	b1709	adhP	b1478
btuD	b1709	amyA	b1927
btuD	b1709	artI	b863
btuD	b1709	artQ	b862
btuE	b1710	aceA	b4015
btuE	b1710	adhP	b1478
btuE	b1710	amyA	b1927
btuE	b1710	artI	b863
btuE	b1710	artP	b864
btuE	b1710	bfr	b3336
btuE	b1710	btuD	b1709
btuF	b158	ampG	b433
btuF	b158	bcsZ	b3531
btuR	b1270	abgR	b1339
btuR	b1270	adiC	b4115
btuR	b1270	anmK	b1640
btuR	b1270	aroD	b1693
btuR	b1270	aroH	b1704
btuR	b1270	azoR	b1412
cadA	b4131	abgR	b1339
cadA	b4131	adiY	b4116
cadA	b4131	araA	b62
cadA	b4131	araB	b63
cadA	b4131	araD	b61
cadA	b4131	araE	b2841
cadB	b4132	adiY	b4116
cadB	b4132	araA	b62
cadB	b4132	araB	b63
cadB	b4132	araD	b61
cadB	b4132	araE	b2841
cadB	b4132	cadA	b4131
cadC	b4133	adiC	b4115
cadC	b4133	adiY	b4116
cadC	b4133	arpA	b4017
cadC	b4133	btuR	b1270
cadC	b4133	cadA	b4131
cadC	b4133	cadB	b4132
caiB	b38	aslA	b3801
caiB	b38	bglB	b3721
caiC	b37	alpA	b2624
caiD	b36	aaeB	b3240
caiD	b36	aegA	b2468
caiD	b36	aes	b476
caiD	b36	afuC	b262
caiD	b36	caiA	b39
caiD	b36	caiC	b37
caiE	b35	aes	b476
caiE	b35	alpA	b2624
caiE	b35	caiC	b37
caiE	b35	caiD	b36
caiF	b34	appY	b564
caiT	b40	aaaD	b4634
caiT	b40	acpH	b404
caiT	b40	acrD	b2470
caiT	b40	afuB	b263
caiT	b40	caiD	b36
can	b126	avtA	b3572
can	b126	bcp	b2480
carA	b32	argA	b2818
carA	b32	argB	b3959
carA	b32	argC	b3958
carA	b32	argD	b3359
carA	b32	argF	b273
carA	b32	argG	b3172
carA	b32	aroA	b908
carA	b32	aroP	b112
carA	b32	artJ	b860
carB	b33	argA	b2818
carB	b33	argB	b3959
carB	b33	argC	b3958
carB	b33	argD	b3359
carB	b33	argF	b273
carB	b33	argG	b3172
carB	b33	argI	b4254
carB	b33	aroA	b908
carB	b33	aroP	b112
carB	b33	artJ	b860
carB	b33	caiF	b34
carB	b33	carA	b32
cbl	b1987	amtB	b451
cbpA	b1000	aidB	b4187
cbpA	b1000	appA	b980
cbpA	b1000	appB	b979
cbpA	b1000	appC	b978
cbpM	b999	aidB	b4187
cbpM	b999	appA	b980
cbpM	b999	appB	b979
cbpM	b999	appC	b978
cbpM	b999	cbpA	b1000
cbrA	b3690	agaV	b3133
cbrA	b3690	alsE	b4085
cbrA	b3690	aslA	b3801
cbrA	b3690	bglB	b3721
cbrA	b3690	bglG	b3723
cbrA	b3690	bglH	b3720
cbrB	b3716	acrF	b3266
cbrB	b3716	bglB	b3721
cbrB	b3716	bglG	b3723
cbrB	b3716	bglH	b3720
cbrC	b3717	aslA	b3801
cbrC	b3717	bglB	b3721
cbrC	b3717	bglG	b3723
cbrC	b3717	bglH	b3720
cbrC	b3717	btuD	b1709
cbrC	b3717	cbrA	b3690
cbrC	b3717	cbrB	b3716
cca	b3056	amiB	b4169
ccmA	b2201	ada	b2213
ccmA	b2201	ansB	b2957
ccmA	b2201	aroM	b390
ccmB	b2200	anmK	b1640
ccmB	b2200	ccmA	b2201
ccmC	b2199	btuC	b1711
ccmC	b2199	btuR	b1270
ccmC	b2199	ccmA	b2201
ccmC	b2199	ccmB	b2200
ccmD	b2198	btuC	b1711
ccmD	b2198	ccmB	b2200
ccmD	b2198	ccmC	b2199
ccmE	b2197	ccmA	b2201
ccmE	b2197	ccmB	b2200
ccmE	b2197	ccmC	b2199
ccmE	b2197	ccmD	b2198
ccmF	b2196	ccmB	b2200
ccmF	b2196	ccmC	b2199
ccmF	b2196	ccmD	b2198
ccmF	b2196	ccmE	b2197
ccmG	b2195	ccmB	b2200
ccmG	b2195	ccmC	b2199
ccmG	b2195	ccmD	b2198
ccmG	b2195	ccmE	b2197
ccmG	b2195	ccmF	b2196
ccmH	b2194	ccmB	b2200
ccmH	b2194	ccmC	b2199
ccmH	b2194	ccmE	b2197
ccmH	b2194	ccmF	b2196
ccmH	b2194	ccmG	b2195
cdh	b3918	alr	b4053
cdh	b3918	alx	b3088
cdh	b3918	ampC	b4150
cdh	b3918	bioH	b3412
cdh	b3918	birA	b3973
cdsA	b175	aroB	b3389
cdsA	b175	aroK	b3390
cdsA	b175	atpI	b3739
cedA	b1731	abgR	b1339
cedA	b1731	arrQ	b1554
cfa	b1661	aidB	b4187
cfa	b1661	amyA	b1927
cfa	b1661	appA	b980
cfa	b1661	btuE	b1710
cfa	b1661	cbpA	b1000
cfa	b1661	cbpM	b999
chaA	b1216	accC	b3256
chaA	b1216	ansA	b1767
chaA	b1216	asnS	b930
chaA	b1216	bglX	b2132
chaB	b1217	acnA	b1276
chaB	b1217	amiD	b867
chaB	b1217	bdm	b1481
chaC	b1218	bdm	b1481
chaC	b1218	cbl	b1987
chaC	b1218	cfa	b1661
chbA	b1736	aroD	b1693
chbB	b1738	aldA	b1415
chbB	b1738	chbA	b1736
chbC	b1737	cedA	b1731
chbC	b1737	chbA	b1736
chbC	b1737	chbB	b1738
chbF	b1734	allC	b516
chbF	b1734	chaC	b1218
chbF	b1734	chbA	b1736
chbF	b1734	chbC	b1737
chbG	b1733	arnF	b2258
chbG	b1733	btuF	b158
chbG	b1733	cedA	b1731
chbG	b1733	chbC	b1737
chbG	b1733	chbF	b1734
chbR	b1735	alkA	b2068
chbR	b1735	arrQ	b1554
chbR	b1735	cedA	b1731
chbR	b1735	chbA	b1736
chbR	b1735	chbB	b1738
chbR	b1735	chbC	b1737
chbR	b1735	chbF	b1734
cheA	b1888	aer	b3072
cheB	b1883	aer	b3072
cheB	b1883	cheA	b1888
cheR	b1884	aer	b3072
cheR	b1884	cheA	b1888
cheR	b1884	cheB	b1883
cheW	b1887	aer	b3072
cheW	b1887	cheA	b1888
cheW	b1887	cheB	b1883
cheW	b1887	cheR	b1884
cheY	b1882	aer	b3072
cheY	b1882	cheA	b1888
cheY	b1882	cheB	b1883
cheY	b1882	cheR	b1884
cheY	b1882	cheW	b1887
cheZ	b1881	aer	b3072
cheZ	b1881	cheA	b1888
cheZ	b1881	cheB	b1883
cheZ	b1881	cheR	b1884
cheZ	b1881	cheW	b1887
cheZ	b1881	cheY	b1882
chpR	b2783	chpA	b2782
chpS	b4224	amiD	b867
chpS	b4224	chpB	b4225
citC	b618	acrD	b2470
citC	b618	agaS	b3136
citC	b618	allD	b517
citD	b617	citC	b618
citE	b616	acrD	b2470
citE	b616	citC	b618
citF	b615	acpH	b404
citF	b615	acrD	b2470
citF	b615	afuB	b263
citF	b615	agaC	b3139
citF	b615	caiT	b40
citF	b615	citC	b618
citF	b615	citE	b616
citG	b613	afuC	b262
citG	b613	citD	b617
citG	b613	citE	b616
citG	b613	citF	b615
citT	b612	abgT	b1336
citT	b612	acrD	b2470
citT	b612	afuB	b263
citT	b612	citC	b618
citT	b612	citE	b616
citT	b612	citF	b615
citT	b612	citG	b613
citX	b614	aaaD	b4634
citX	b614	acpH	b404
citX	b614	acrD	b2470
citX	b614	afuB	b263
citX	b614	afuC	b262
citX	b614	caiT	b40
citX	b614	citD	b617
citX	b614	citE	b616
citX	b614	citF	b615
citX	b614	citG	b613
citX	b614	citT	b612
clcA	b155	aroE	b3281
clcB	b1592	abgA	b1338
clcB	b1592	abgB	b1337
clcB	b1592	abgR	b1339
clcB	b1592	abgT	b1336
clcB	b1592	aegA	b2468
clcB	b1592	alkA	b2068
clcB	b1592	anmK	b1640
clcB	b1592	arrQ	b1554
clcB	b1592	astE	b1744
clcB	b1592	baeS	b2078
clcB	b1592	ccmB	b2200
clcB	b1592	ccmF	b2196
clcB	b1592	ccmH	b2194
cld	b2027	adk	b474
cld	b2027	ansA	b1767
cld	b2027	apt	b469
cld	b2027	argS	b1876
cld	b2027	asnS	b930
cld	b2027	blr	b4409
cld	b2027	chaA	b1216
clpA	b882	allR	b506
clpA	b882	ampC	b4150
clpA	b882	cdh	b3918
clpS	b881	alx	b3088
clpS	b881	clpA	b882
clpX	b438	clpP	b437
cls	b1249	amn	b1982
cls	b1249	aroD	b1693
cls	b1249	aroG	b754
cls	b1249	aroH	b1704
cls	b1249	azoR	b1412
cls	b1249	chbB	b1738
cmk	b910	aroK	b3390
cmk	b910	bamB	b2512
cmk	b910	cdsA	b175
cmoA	b1870	ansA	b1767
cmoA	b1870	apt	b469
cmoA	b1870	argS	b1876
cmoA	b1870	aspS	b1866
cmoA	b1870	bglX	b2132
cmoA	b1870	chaA	b1216
cmoA	b1870	cld	b2027
cmoB	b1871	ansP	b1453
cmoB	b1871	argS	b1876
cmoB	b1871	aroH	b1704
cmoB	b1871	bglX	b2132
cmoB	b1871	ccmE	b2197
cmoB	b1871	ccmF	b2196
cmoB	b1871	ccmH	b2194
cmoB	b1871	chaA	b1216
cmoB	b1871	cmoA	b1870
cmr	b842	ansP	b1453
cmr	b842	apt	b469
cmr	b842	bacA	b3057
cmtA	b2933	aaeB	b3240
cmtA	b2933	aegA	b2468
cmtA	b2933	alkA	b2068
cmtA	b2933	ascB	b2716
cmtA	b2933	caiC	b37
cmtA	b2933	caiE	b35
cmtB	b2934	acrF	b3266
cmtB	b2934	agaV	b3133
cmtB	b2934	alsB	b4088
cmtB	b2934	arpA	b4017
cmtB	b2934	bglB	b3721
cmtB	b2934	bglG	b3723
cmtB	b2934	cbrA	b3690
cnu	b1625	blr	b4409
coaA	b3974	accB	b3255
coaA	b3974	accC	b3256
coaA	b3974	acrA	b463
coaA	b3974	acrB	b462
coaA	b3974	acrR	b464
coaA	b3974	ansA	b1767
coaA	b3974	aroE	b3281
coaA	b3974	aroK	b3390
coaA	b3974	bamD	b2595
coaD	b3634	bcsZ	b3531
cobB	b1120	amn	b1982
cobB	b1120	aspC	b928
cobB	b1120	bglX	b2132
cobB	b1120	btuC	b1711
cobB	b1120	btuR	b1270
cobC	b638	ansA	b1767
cobS	b1992	cls	b1249
cobT	b1991	amn	b1982
cobT	b1991	aroD	b1693
cobT	b1991	cls	b1249
cobT	b1991	cobS	b1992
cobU	b1993	amn	b1982
cobU	b1993	ampH	b376
cobU	b1993	chpR	b2783
cobU	b1993	cls	b1249
cobU	b1993	cobS	b1992
cobU	b1993	cobT	b1991
codA	b337	argA	b2818
codA	b337	argB	b3959
codA	b337	argC	b3958
codA	b337	argD	b3359
codA	b337	argF	b273
codA	b337	argG	b3172
codA	b337	argH	b3960
codA	b337	argI	b4254
codA	b337	aroA	b908
codA	b337	aroG	b754
codA	b337	aroP	b112
codA	b337	artJ	b860
codA	b337	aspC	b928
codA	b337	bioD	b778
codA	b337	carA	b32
codA	b337	carB	b33
codB	b336	argA	b2818
codB	b336	argB	b3959
codB	b336	argC	b3958
codB	b336	argD	b3359
codB	b336	argF	b273
codB	b336	argG	b3172
codB	b336	argI	b4254
codB	b336	aroA	b908
codB	b336	aroG	b754
codB	b336	aroP	b112
codB	b336	artJ	b860
codB	b336	bioB	b775
codB	b336	bioC	b777
codB	b336	bioD	b778
codB	b336	carA	b32
codB	b336	carB	b33
codB	b336	codA	b337
cof	b446	bssR	b836
cof	b446	clpA	b882
copA	b484	appA	b980
copA	b484	appB	b979
copA	b484	appC	b978
copA	b484	cbpA	b1000
copA	b484	cbpM	b999
copA	b484	cfa	b1661
cpdB	b4213	aphA	b4055
cpdB	b4213	aspA	b4139
cpsB	b2049	aaeB	b3240
cpsB	b2049	abgA	b1338
cpsB	b2049	aegA	b2468
cpsB	b2049	alkA	b2068
cpsB	b2049	allA	b505
cpsB	b2049	anmK	b1640
cpsB	b2049	arrQ	b1554
cpsB	b2049	ascB	b2716
cpsB	b2049	baeS	b2078
cpsB	b2049	bioA	b774
cpsB	b2049	ccmA	b2201
cpsB	b2049	ccmF	b2196
cpsB	b2049	chbR	b1735
cpsB	b2049	clcB	b1592
cpsB	b2049	cmtA	b2933
cpsG	b2048	aaeB	b3240
cpsG	b2048	abgA	b1338
cpsG	b2048	aegA	b2468
cpsG	b2048	alkA	b2068
cpsG	b2048	allA	b505
cpsG	b2048	ascF	b2715
cpsG	b2048	ccmF	b2196
cpsG	b2048	cdaR	b162
cpsG	b2048	clcB	b1592
cpsG	b2048	cmtA	b2933
cpsG	b2048	cpsB	b2049
cpxP	b4484	astC	b1748
cpxP	b4484	betT	b314
cpxR	b3912	bamA	b177
cpxR	b3912	cpxA	b3911
crcB	b624	allR	b506
creA	b4397	acrA	b463
creB	b4398	creA	b4397
creC	b4399	aaeX	b3242
creC	b4399	afuB	b263
creC	b4399	agaC	b3139
creD	b4400	agaC	b3139
creD	b4400	agaD	b3140
creD	b4400	creC	b4399
crl	b240	amiB	b4169
crp	b3357	atpA	b3734
crp	b3357	atpB	b3738
crp	b3357	atpE	b3737
crp	b3357	atpF	b3736
crp	b3357	atpH	b3735
crr	b2417	arcA	b4401
crr	b2417	bolA	b435
csdE	b2811	csdA	b2810
csgA	b1042	chbF	b1734
csgB	b1041	csgA	b1042
csgC	b1043	amiB	b4169
csgD	b1040	argA	b2818
csgD	b1040	argE	b3957
csgD	b1040	argF	b273
csgD	b1040	aroD	b1693
csgD	b1040	aroP	b112
csgD	b1040	chaC	b1218
csgD	b1040	chbF	b1734
csgD	b1040	csgA	b1042
csgE	b1039	argF	b273
csgE	b1039	arnD	b2256
csgE	b1039	aroD	b1693
csgE	b1039	aroP	b112
csgE	b1039	csgA	b1042
csgE	b1039	csgD	b1040
csgF	b1038	argA	b2818
csgF	b1038	arnA	b2255
csgF	b1038	arnB	b2253
csgF	b1038	arnC	b2254
csgF	b1038	aroD	b1693
csgF	b1038	csgA	b1042
csgF	b1038	csgD	b1040
csgF	b1038	csgE	b1039
csgG	b1037	aroD	b1693
csgG	b1037	arrQ	b1554
csgG	b1037	azoR	b1412
csgG	b1037	chbF	b1734
csgG	b1037	clcB	b1592
csgG	b1037	csgA	b1042
csgG	b1037	csgD	b1040
csgG	b1037	csgE	b1039
csgG	b1037	csgF	b1038
csiD	b2659	aceA	b4015
csiD	b2659	aceB	b4014
csiD	b2659	acs	b4069
csiD	b2659	adhP	b1478
csiD	b2659	aldB	b3588
csiD	b2659	amyA	b1927
csiD	b2659	ariR	b1166
csiD	b2659	astA	b1747
csiD	b2659	astB	b1745
csiD	b2659	astC	b1748
csiD	b2659	astD	b1746
csiD	b2659	astE	b1744
csiE	b2535	acs	b4069
csiE	b2535	agp	b1002
csiE	b2535	aldB	b3588
csiE	b2535	artP	b864
csiE	b2535	astA	b1747
csiE	b2535	astB	b1745
csiE	b2535	astC	b1748
csiE	b2535	astD	b1746
csiE	b2535	atoS	b2219
csiE	b2535	csiD	b2659
cspB	b1557	aroM	b390
cspB	b1557	cspA	b3556
cspC	b1823	aspC	b928
cspC	b1823	bcp	b2480
cspD	b880	aceA	b4015
cspD	b880	acs	b4069
cspD	b880	agp	b1002
cspD	b880	aldA	b1415
cspD	b880	aldB	b3588
cspD	b880	birA	b3973
cspD	b880	bolA	b435
cspD	b880	bssR	b836
cspD	b880	cdh	b3918
cspD	b880	clpA	b882
cspD	b880	csiE	b2535
cspF	b1558	cdsA	b175
cspF	b1558	cnu	b1625
cspF	b1558	cspA	b3556
cspF	b1558	cspB	b1557
cspG	b990	abgR	b1339
cspG	b990	araJ	b396
cspG	b990	aroM	b390
cspG	b990	cspA	b3556
cspG	b990	cspB	b1557
cspG	b990	cspF	b1558
cspH	b989	amn	b1982
cspH	b989	cspB	b1557
cspH	b989	cspF	b1558
cspH	b989	cspG	b990
cspI	b1552	cspB	b1557
cspI	b1552	cspG	b990
cspI	b1552	cspH	b989
csrA	b2696	arcA	b4401
csrA	b2696	bolA	b435
csrA	b2696	crr	b2417
csrA	b2696	cspE	b623
csrC	b4457	csrB	b4408
csrD	b3252	argU	b536
csrD	b3252	argX	b3796
cstA	b598	acs	b4069
cstA	b598	actP	b4067
cstA	b598	agp	b1002
cstA	b598	aldA	b1415
cstA	b598	aldB	b3588
cstA	b598	argT	b2310
cstA	b598	cspD	b880
cueO	b123	clpA	b882
cueR	b487	aidB	b4187
cueR	b487	appA	b980
cueR	b487	cbpA	b1000
cueR	b487	cbpM	b999
cueR	b487	cfa	b1661
cueR	b487	copA	b484
cusA	b575	argF	b273
cusA	b575	bioC	b777
cusA	b575	bioF	b776
cusA	b575	citT	b612
cusA	b575	csgG	b1037
cusB	b574	argF	b273
cusB	b574	bioA	b774
cusB	b574	bioC	b777
cusB	b574	bioF	b776
cusB	b574	cusA	b575
cusC	b572	argA	b2818
cusC	b572	argC	b3958
cusC	b572	argD	b3359
cusC	b572	argF	b273
cusC	b572	argG	b3172
cusC	b572	aroG	b754
cusC	b572	aroP	b112
cusC	b572	bioB	b775
cusC	b572	csgE	b1039
cusC	b572	csgF	b1038
cusC	b572	csgG	b1037
cusC	b572	cusA	b575
cusC	b572	cusB	b574
cusF	b573	argA	b2818
cusF	b573	argB	b3959
cusF	b573	argC	b3958
cusF	b573	argD	b3359
cusF	b573	argF	b273
cusF	b573	argG	b3172
cusF	b573	argI	b4254
cusF	b573	aroA	b908
cusF	b573	aroD	b1693
cusF	b573	aroG	b754
cusF	b573	aroP	b112
cusF	b573	artJ	b860
cusF	b573	bioB	b775
cusF	b573	bioC	b777
cusF	b573	bioF	b776
cusF	b573	codA	b337
cusF	b573	codB	b336
cusF	b573	csgD	b1040
cusF	b573	csgE	b1039
cusF	b573	csgF	b1038
cusF	b573	csgG	b1037
cusF	b573	cusA	b575
cusF	b573	cusB	b574
cusF	b573	cusC	b572
cusR	b571	aroG	b754
cusR	b571	aroH	b1704
cusR	b571	aroP	b112
cusR	b571	bioC	b777
cusR	b571	bioF	b776
cusR	b571	cls	b1249
cusR	b571	csgG	b1037
cusR	b571	cusA	b575
cusR	b571	cusB	b574
cusR	b571	cusC	b572
cusR	b571	cusF	b573
cusS	b570	citC	b618
cutC	b1874	arnE	b4544
cutC	b1874	bglG	b3723
cutC	b1874	btuR	b1270
cutC	b1874	cobU	b1993
cutC	b1874	crcB	b624
cvpA	b2313	argA	b2818
cvpA	b2313	argB	b3959
cvpA	b2313	argC	b3958
cvpA	b2313	argD	b3359
cvpA	b2313	argF	b273
cvpA	b2313	argG	b3172
cvpA	b2313	argI	b4254
cvpA	b2313	aroA	b908
cvpA	b2313	aroG	b754
cvpA	b2313	aroP	b112
cvpA	b2313	artJ	b860
cvpA	b2313	bioC	b777
cvpA	b2313	bioD	b778
cvpA	b2313	carA	b32
cvpA	b2313	carB	b33
cvpA	b2313	codA	b337
cvpA	b2313	codB	b336
cvpA	b2313	cusR	b571
cvrA	b1191	aspC	b928
cvrA	b1191	btuR	b1270
cvrA	b1191	cls	b1249
cyaA	b3806	aaeR	b3243
cyaR	b4438	agp	b1002
cyaR	b4438	aldA	b1415
cyaR	b4438	cspD	b880
cyaR	b4438	cstA	b598
cyaY	b3807	ampC	b4150
cyaY	b3807	birA	b3973
cyaY	b3807	cdh	b3918
cybB	b1418	alaS	b2697
cybB	b1418	amiC	b2817
cybB	b1418	ansA	b1767
cybB	b1418	asnS	b930
cybB	b1418	bglX	b2132
cybB	b1418	btuC	b1711
cybB	b1418	chaA	b1216
cybB	b1418	cld	b2027
cybB	b1418	cls	b1249
cybB	b1418	cmoA	b1870
cybB	b1418	cobB	b1120
cybB	b1418	cobS	b1992
cybB	b1418	cobT	b1991
cybB	b1418	cobU	b1993
cybB	b1418	creA	b4397
cybC	b4236	bcsE	b3536
cycA	b4208	aldA	b1415
cycA	b4208	argT	b2310
cycA	b4208	cspD	b880
cycA	b4208	cstA	b598
cydA	b733	aceE	b114
cydA	b733	aceF	b115
cydB	b734	aceF	b115
cydB	b734	adiY	b4116
cydB	b734	cydA	b733
cydC	b886	aat	b885
cydC	b886	acrB	b462
cydC	b886	alaS	b2697
cydC	b886	ansA	b1767
cydC	b886	bamD	b2595
cydC	b886	cobC	b638
cydC	b886	cybB	b1418
cydD	b887	ampG	b433
cydD	b887	ansA	b1767
cydD	b887	cydC	b886
cynS	b340	bioC	b777
cynS	b340	citF	b615
cynS	b340	citG	b613
cynS	b340	citT	b612
cynS	b340	cspI	b1552
cynT	b339	citC	b618
cynT	b339	cynR	b338
cynT	b339	cynS	b340
cynX	b341	citC	b618
cynX	b341	citT	b612
cynX	b341	cusS	b570
cynX	b341	cynR	b338
cynX	b341	cynT	b339
cyoA	b432	accB	b3255
cyoA	b432	atpA	b3734
cyoA	b432	atpB	b3738
cyoA	b432	atpE	b3737
cyoA	b432	atpF	b3736
cyoA	b432	atpG	b3733
cyoA	b432	atpH	b3735
cyoA	b432	caiF	b34
cyoB	b431	accB	b3255
cyoB	b431	aceE	b114
cyoB	b431	aceF	b115
cyoB	b431	acnB	b118
cyoB	b431	atpA	b3734
cyoB	b431	atpB	b3738
cyoB	b431	atpC	b3731
cyoB	b431	atpD	b3732
cyoB	b431	atpE	b3737
cyoB	b431	atpF	b3736
cyoB	b431	atpG	b3733
cyoB	b431	atpH	b3735
cyoB	b431	cyoA	b432
cyoC	b430	accB	b3255
cyoC	b430	aceE	b114
cyoC	b430	aceF	b115
cyoC	b430	acnB	b118
cyoC	b430	atpA	b3734
cyoC	b430	atpB	b3738
cyoC	b430	atpC	b3731
cyoC	b430	atpD	b3732
cyoC	b430	atpE	b3737
cyoC	b430	atpF	b3736
cyoC	b430	atpG	b3733
cyoC	b430	atpH	b3735
cyoC	b430	cyoA	b432
cyoC	b430	cyoB	b431
cyoD	b429	aceF	b115
cyoD	b429	acnB	b118
cyoD	b429	atpA	b3734
cyoD	b429	atpC	b3731
cyoD	b429	atpD	b3732
cyoD	b429	atpE	b3737
cyoD	b429	atpF	b3736
cyoD	b429	atpG	b3733
cyoD	b429	atpH	b3735
cyoD	b429	cyoA	b432
cyoD	b429	cyoB	b431
cyoD	b429	cyoC	b430
cyoE	b428	accC	b3256
cyoE	b428	acnB	b118
cyoE	b428	atpA	b3734
cyoE	b428	atpC	b3731
cyoE	b428	atpD	b3732
cyoE	b428	atpG	b3733
cyoE	b428	cyoA	b432
cyoE	b428	cyoB	b431
cyoE	b428	cyoC	b430
cyoE	b428	cyoD	b429
cysA	b2422	argF	b273
cysA	b2422	aroG	b754
cysA	b2422	asnB	b674
cysA	b2422	bioC	b777
cysA	b2422	cbl	b1987
cysA	b2422	codA	b337
cysA	b2422	cusB	b574
cysB	b1275	aroA	b908
cysB	b1275	cld	b2027
cysB	b1275	cls	b1249
cysB	b1275	cybB	b1418
cysC	b2750	argA	b2818
cysC	b2750	argB	b3959
cysC	b2750	argC	b3958
cysC	b2750	argG	b3172
cysC	b2750	argI	b4254
cysC	b2750	aroA	b908
cysC	b2750	aroG	b754
cysC	b2750	aroP	b112
cysC	b2750	artJ	b860
cysC	b2750	asd	b3433
cysC	b2750	carA	b32
cysC	b2750	carB	b33
cysC	b2750	cbl	b1987
cysC	b2750	codA	b337
cysC	b2750	codB	b336
cysC	b2750	cvpA	b2313
cysC	b2750	cysA	b2422
cysD	b2752	argA	b2818
cysD	b2752	argB	b3959
cysD	b2752	argC	b3958
cysD	b2752	argG	b3172
cysD	b2752	aroA	b908
cysD	b2752	aroG	b754
cysD	b2752	aroP	b112
cysD	b2752	artJ	b860
cysD	b2752	cbl	b1987
cysD	b2752	codA	b337
cysD	b2752	codB	b336
cysD	b2752	cusF	b573
cysD	b2752	cysA	b2422
cysD	b2752	cysC	b2750
cysE	b3607	acpT	b3475
cysE	b3607	cpxA	b3911
cysG	b3368	ccmA	b2201
cysH	b2762	argA	b2818
cysH	b2762	argF	b273
cysH	b2762	argG	b3172
cysH	b2762	aroA	b908
cysH	b2762	aroG	b754
cysH	b2762	aroP	b112
cysH	b2762	artJ	b860
cysH	b2762	asd	b3433
cysH	b2762	carA	b32
cysH	b2762	carB	b33
cysH	b2762	cbl	b1987
cysH	b2762	codA	b337
cysH	b2762	codB	b336
cysH	b2762	cysA	b2422
cysH	b2762	cysC	b2750
cysH	b2762	cysD	b2752
cysI	b2763	argA	b2818
cysI	b2763	argF	b273
cysI	b2763	argG	b3172
cysI	b2763	aroG	b754
cysI	b2763	aroP	b112
cysI	b2763	artJ	b860
cysI	b2763	asd	b3433
cysI	b2763	carA	b32
cysI	b2763	carB	b33
cysI	b2763	cbl	b1987
cysI	b2763	codA	b337
cysI	b2763	codB	b336
cysI	b2763	cysA	b2422
cysI	b2763	cysC	b2750
cysI	b2763	cysD	b2752
cysI	b2763	cysH	b2762
cysJ	b2764	argA	b2818
cysJ	b2764	argF	b273
cysJ	b2764	artJ	b860
cysJ	b2764	cbl	b1987
cysJ	b2764	codA	b337
cysJ	b2764	codB	b336
cysJ	b2764	cysA	b2422
cysJ	b2764	cysC	b2750
cysJ	b2764	cysD	b2752
cysJ	b2764	cysH	b2762
cysJ	b2764	cysI	b2763
cysK	b2414	amn	b1982
cysK	b2414	argA	b2818
cysK	b2414	argG	b3172
cysK	b2414	argI	b4254
cysK	b2414	aroA	b908
cysK	b2414	aroG	b754
cysK	b2414	aroP	b112
cysK	b2414	artJ	b860
cysK	b2414	asd	b3433
cysK	b2414	carB	b33
cysK	b2414	cbl	b1987
cysK	b2414	codA	b337
cysK	b2414	codB	b336
cysK	b2414	cysA	b2422
cysK	b2414	cysC	b2750
cysK	b2414	cysD	b2752
cysK	b2414	cysH	b2762
cysK	b2414	cysI	b2763
cysK	b2414	cysJ	b2764
cysM	b2421	argA	b2818
cysM	b2421	argD	b3359
cysM	b2421	argF	b273
cysM	b2421	argG	b3172
cysM	b2421	argI	b4254
cysM	b2421	aroA	b908
cysM	b2421	aroD	b1693
cysM	b2421	aroG	b754
cysM	b2421	aroH	b1704
cysM	b2421	aroP	b112
cysM	b2421	artJ	b860
cysM	b2421	asd	b3433
cysM	b2421	asnB	b674
cysM	b2421	bioC	b777
cysM	b2421	carA	b32
cysM	b2421	carB	b33
cysM	b2421	cbl	b1987
cysM	b2421	codA	b337
cysM	b2421	codB	b336
cysM	b2421	cusF	b573
cysM	b2421	cvpA	b2313
cysM	b2421	cysA	b2422
cysM	b2421	cysC	b2750
cysM	b2421	cysD	b2752
cysM	b2421	cysH	b2762
cysM	b2421	cysI	b2763
cysM	b2421	cysJ	b2764
cysM	b2421	cysK	b2414
cysN	b2751	argA	b2818
cysN	b2751	argB	b3959
cysN	b2751	argG	b3172
cysN	b2751	aroA	b908
cysN	b2751	aroG	b754
cysN	b2751	aroP	b112
cysN	b2751	artJ	b860
cysN	b2751	cbl	b1987
cysN	b2751	codA	b337
cysN	b2751	codB	b336
cysN	b2751	cvpA	b2313
cysN	b2751	cysA	b2422
cysN	b2751	cysC	b2750
cysN	b2751	cysD	b2752
cysN	b2751	cysH	b2762
cysN	b2751	cysI	b2763
cysN	b2751	cysJ	b2764
cysN	b2751	cysK	b2414
cysN	b2751	cysM	b2421
cysP	b2425	cbl	b1987
cysP	b2425	cysA	b2422
cysP	b2425	cysC	b2750
cysP	b2425	cysD	b2752
cysP	b2425	cysH	b2762
cysP	b2425	cysI	b2763
cysP	b2425	cysJ	b2764
cysP	b2425	cysK	b2414
cysP	b2425	cysM	b2421
cysP	b2425	cysN	b2751
cysQ	b4214	arcA	b4401
cysQ	b4214	bolA	b435
cysQ	b4214	csrA	b2696
cysS	b526	apt	b469
cysS	b526	argS	b1876
cysT	b1910	argU	b536
cysT	b1910	argW	b2348
cysT	b1910	argX	b3796
cysT	b1910	csrD	b3252
cysU	b2424	aroG	b754
cysU	b2424	cbl	b1987
cysU	b2424	codA	b337
cysU	b2424	codB	b336
cysU	b2424	cysA	b2422
cysU	b2424	cysC	b2750
cysU	b2424	cysD	b2752
cysU	b2424	cysH	b2762
cysU	b2424	cysI	b2763
cysU	b2424	cysJ	b2764
cysU	b2424	cysK	b2414
cysU	b2424	cysM	b2421
cysU	b2424	cysN	b2751
cysU	b2424	cysP	b2425
cysW	b2423	cbl	b1987
cysW	b2423	cysA	b2422
cysW	b2423	cysC	b2750
cysW	b2423	cysD	b2752
cysW	b2423	cysH	b2762
cysW	b2423	cysI	b2763
cysW	b2423	cysJ	b2764
cysW	b2423	cysK	b2414
cysW	b2423	cysM	b2421
cysW	b2423	cysN	b2751
cysW	b2423	cysP	b2425
cysW	b2423	cysU	b2424
cysZ	b2413	ansA	b1767
cysZ	b2413	bamD	b2595
cysZ	b2413	cmoA	b1870
cytR	b3934	aphA	b4055
cytR	b3934	cdd	b2143
dacA	b632	accA	b185
dacA	b632	accB	b3255
dacA	b632	accC	b3256
dacA	b632	accD	b2316
dacA	b632	acpP	b1094
dacA	b632	adk	b474
dacA	b632	ansA	b1767
dacA	b632	apt	b469
dacA	b632	atpA	b3734
dacA	b632	atpB	b3738
dacA	b632	atpC	b3731
dacA	b632	atpD	b3732
dacA	b632	atpE	b3737
dacA	b632	atpF	b3736
dacA	b632	atpG	b3733
dacA	b632	atpH	b3735
dacA	b632	avtA	b3572
dacA	b632	bamD	b2595
dacA	b632	bcp	b2480
dacA	b632	can	b126
dacA	b632	chaA	b1216
dacA	b632	cobC	b638
dacA	b632	cydD	b887
dacA	b632	cysZ	b2413
dacB	b3182	accB	b3255
dacB	b3182	avtA	b3572
dacB	b3182	coaA	b3974
dacC	b839	bfr	b3336
dacC	b839	cbpA	b1000
dacC	b839	cfa	b1661
dacC	b839	chaC	b1218
dacC	b839	cls	b1249
dacD	b2010	chbB	b1738
dacD	b2010	cobS	b1992
dacD	b2010	cobU	b1993
dadA	b1189	acs	b4069
dadA	b1189	aldA	b1415
dadA	b1189	aldB	b3588
dadA	b1189	argT	b2310
dadA	b1189	astA	b1747
dadA	b1189	astB	b1745
dadA	b1189	astC	b1748
dadA	b1189	astD	b1746
dadA	b1189	csiD	b2659
dadA	b1189	cspD	b880
dadA	b1189	cstA	b598
dadX	b1190	abgR	b1339
dadX	b1190	acnA	b1276
dadX	b1190	aldA	b1415
dadX	b1190	argT	b2310
dadX	b1190	astC	b1748
dadX	b1190	astD	b1746
dadX	b1190	astE	b1744
dadX	b1190	cstA	b598
dadX	b1190	dadA	b1189
dam	b3387	accB	b3255
dam	b3387	aroB	b3389
damX	b3388	accB	b3255
damX	b3388	accC	b3256
damX	b3388	alaS	b2697
damX	b3388	aroB	b3389
damX	b3388	aroK	b3390
damX	b3388	atpD	b3732
damX	b3388	atpG	b3733
damX	b3388	atpH	b3735
damX	b3388	avtA	b3572
damX	b3388	dam	b3387
dapA	b2478	accB	b3255
dapA	b2478	accD	b2316
dapA	b2478	adk	b474
dapA	b2478	aroK	b3390
dapA	b2478	atpB	b3738
dapA	b2478	atpI	b3739
dapA	b2478	bamC	b2477
dapA	b2478	bamD	b2595
dapA	b2478	crp	b3357
dapB	b31	argA	b2818
dapB	b31	argD	b3359
dapB	b31	argF	b273
dapB	b31	argG	b3172
dapB	b31	argI	b4254
dapB	b31	aroA	b908
dapB	b31	aroG	b754
dapB	b31	aroP	b112
dapB	b31	artJ	b860
dapB	b31	asd	b3433
dapB	b31	carA	b32
dapB	b31	carB	b33
dapB	b31	codA	b337
dapB	b31	codB	b336
dapB	b31	cysM	b2421
dapD	b166	acpS	b2563
dapD	b166	argP	b2916
dapD	b166	aroA	b908
dapD	b166	aroG	b754
dapD	b166	asd	b3433
dapD	b166	aspC	b928
dapD	b166	avtA	b3572
dapD	b166	bamD	b2595
dapD	b166	bcp	b2480
dapD	b166	can	b126
dapD	b166	cspC	b1823
dapD	b166	dapB	b31
dapE	b2472	cobU	b1993
dapF	b3809	atpA	b3734
dapF	b3809	atpD	b3732
dapF	b3809	atpG	b3733
dapF	b3809	bglA	b2901
dbpA	b1343	abgA	b1338
dbpA	b1343	abgB	b1337
dbpA	b1343	abgR	b1339
dbpA	b1343	abgT	b1336
dbpA	b1343	anmK	b1640
dbpA	b1343	araA	b62
dbpA	b1343	araB	b63
dbpA	b1343	araD	b61
dbpA	b1343	araE	b2841
dbpA	b1343	araJ	b396
dbpA	b1343	bcsE	b3536
dbpA	b1343	bcsF	b3537
dbpA	b1343	btuR	b1270
dbpA	b1343	cadA	b4131
dbpA	b1343	cadB	b4132
dbpA	b1343	ccmF	b2196
dbpA	b1343	cedA	b1731
dbpA	b1343	clcB	b1592
dbpA	b1343	cspG	b990
dcd	b2065	arpA	b4017
dcd	b2065	ascG	b2714
dcd	b2065	bglB	b3721
dcd	b2065	bglG	b3723
dcd	b2065	btuC	b1711
dcd	b2065	cutC	b1874
dcm	b1961	ansA	b1767
dcm	b1961	aroH	b1704
dcm	b1961	btuC	b1711
dcm	b1961	cmoA	b1870
dcm	b1961	cmoB	b1871
dcp	b1538	amn	b1982
dcp	b1538	aroD	b1693
dcp	b1538	aroH	b1704
dcp	b1538	azoR	b1412
dcp	b1538	btuE	b1710
dcp	b1538	btuR	b1270
dcp	b1538	cadC	b4133
dcp	b1538	chbA	b1736
dcp	b1538	cls	b1249
dcp	b1538	cutC	b1874
dctA	b3528	aldA	b1415
dctA	b3528	aphA	b4055
dctA	b3528	aspA	b4139
dctA	b3528	cpdB	b4213
dctA	b3528	cstA	b598
dctA	b3528	dadA	b1189
dctR	b3507	aidB	b4187
dctR	b3507	appA	b980
dctR	b3507	appB	b979
dctR	b3507	appC	b978
dctR	b3507	cbpA	b1000
dctR	b3507	cbpM	b999
dctR	b3507	cueR	b487
dcuA	b4138	ansB	b2957
dcuA	b4138	aspA	b4139
dcuA	b4138	cpdB	b4213
dcuA	b4138	cydA	b733
dcuA	b4138	cydB	b734
dcuB	b4123	adiY	b4116
dcuB	b4123	ansB	b2957
dcuB	b4123	bfd	b3337
dcuB	b4123	dcuA	b4138
dcuC	b621	abrB	b715
dcuC	b621	ansB	b2957
dcuC	b621	ccmA	b2201
dcuC	b621	dcuA	b4138
dcuC	b621	dcuB	b4123
dcuD	b3227	cynX	b341
dcuS	b4125	aphA	b4055
dcuS	b4125	arcB	b3210
dcuS	b4125	cytR	b3934
dcuS	b4125	dcuR	b4124
dcyD	b1919	amn	b1982
dcyD	b1919	argE	b3957
dcyD	b1919	aroD	b1693
dcyD	b1919	aroG	b754
dcyD	b1919	btuR	b1270
dcyD	b1919	cadC	b4133
dcyD	b1919	cls	b1249
dcyD	b1919	csgD	b1040
dcyD	b1919	cysA	b2422
dcyD	b1919	cysC	b2750
dcyD	b1919	cysD	b2752
dcyD	b1919	cysH	b2762
dcyD	b1919	cysI	b2763
dcyD	b1919	cysJ	b2764
dcyD	b1919	cysK	b2414
dcyD	b1919	cysM	b2421
dcyD	b1919	cysN	b2751
dcyD	b1919	cysP	b2425
dcyD	b1919	cysU	b2424
dcyD	b1919	cysW	b2423
dcyD	b1919	dcp	b1538
ddlB	b92	arpB	b4494
ddlB	b92	clcA	b155
ddpA	b1487	abgA	b1338
ddpA	b1487	abgB	b1337
ddpA	b1487	abgR	b1339
ddpA	b1487	astA	b1747
ddpA	b1487	astB	b1745
ddpA	b1487	astC	b1748
ddpA	b1487	astE	b1744
ddpA	b1487	dbpA	b1343
ddpB	b1486	abgA	b1338
ddpB	b1486	abgB	b1337
ddpB	b1486	abgR	b1339
ddpB	b1486	abgT	b1336
ddpB	b1486	anmK	b1640
ddpB	b1486	astE	b1744
ddpB	b1486	clcB	b1592
ddpB	b1486	dbpA	b1343
ddpB	b1486	ddpA	b1487
ddpC	b1485	abgA	b1338
ddpC	b1485	abgB	b1337
ddpC	b1485	abgR	b1339
ddpC	b1485	abgT	b1336
ddpC	b1485	alkA	b2068
ddpC	b1485	anmK	b1640
ddpC	b1485	astB	b1745
ddpC	b1485	astE	b1744
ddpC	b1485	clcB	b1592
ddpC	b1485	dbpA	b1343
ddpC	b1485	ddpA	b1487
ddpC	b1485	ddpB	b1486
ddpD	b1484	abgA	b1338
ddpD	b1484	abgB	b1337
ddpD	b1484	abgR	b1339
ddpD	b1484	astA	b1747
ddpD	b1484	astB	b1745
ddpD	b1484	astC	b1748
ddpD	b1484	astD	b1746
ddpD	b1484	astE	b1744
ddpD	b1484	clcB	b1592
ddpD	b1484	dbpA	b1343
ddpD	b1484	ddpA	b1487
ddpD	b1484	ddpB	b1486
ddpD	b1484	ddpC	b1485
ddpF	b1483	abgA	b1338
ddpF	b1483	abgB	b1337
ddpF	b1483	abgR	b1339
ddpF	b1483	alkA	b2068
ddpF	b1483	astE	b1744
ddpF	b1483	clcB	b1592
ddpF	b1483	ddpA	b1487
ddpF	b1483	ddpB	b1486
ddpF	b1483	ddpC	b1485
ddpF	b1483	ddpD	b1484
ddpX	b1488	adhP	b1478
ddpX	b1488	amtB	b451
ddpX	b1488	argT	b2310
ddpX	b1488	astA	b1747
ddpX	b1488	astB	b1745
ddpX	b1488	astC	b1748
ddpX	b1488	astD	b1746
ddpX	b1488	astE	b1744
ddpX	b1488	csiD	b2659
ddpX	b1488	ddpA	b1487
ddpX	b1488	ddpC	b1485
ddpX	b1488	ddpD	b1484
deaD	b3162	cspA	b3556
deaD	b3162	cspD	b880
dedA	b2317	accD	b2316
degS	b3235	acrB	b462
deoA	b4382	aspA	b4139
deoA	b4382	cdd	b2143
deoA	b4382	crl	b240
deoA	b4382	cysM	b2421
deoB	b4383	ais	b2252
deoB	b4383	amiB	b4169
deoB	b4383	betB	b312
deoB	b4383	betI	b313
deoB	b4383	cdd	b2143
deoB	b4383	crl	b240
deoB	b4383	deoA	b4382
deoC	b4381	cbl	b1987
deoC	b4381	cdd	b2143
deoC	b4381	crl	b240
deoC	b4381	deoA	b4382
deoC	b4381	deoB	b4383
deoD	b4384	ais	b2252
deoD	b4384	argA	b2818
deoD	b4384	cbl	b1987
deoD	b4384	crl	b240
deoD	b4384	deoA	b4382
deoD	b4384	deoB	b4383
deoD	b4384	deoC	b4381
deoR	b840	cld	b2027
deoR	b840	cls	b1249
deoR	b840	cmoA	b1870
deoR	b840	cmr	b842
deoR	b840	cybB	b1418
der	b2511	bamB	b2512
der	b2511	bglB	b3721
der	b2511	clpX	b438
der	b2511	dedD	b2314
dfp	b3639	accB	b3255
dfp	b3639	adk	b474
dfp	b3639	atpA	b3734
dfp	b3639	atpB	b3738
dfp	b3639	atpE	b3737
dfp	b3639	atpF	b3736
dfp	b3639	atpG	b3733
dfp	b3639	atpH	b3735
dfp	b3639	atpI	b3739
dfp	b3639	dacA	b632
dfp	b3639	dcrB	b3472
dgkA	b4042	acrA	b463
dgkA	b4042	aroE	b3281
dgkA	b4042	aroK	b3390
dgkA	b4042	coaE	b103
dgkA	b4042	creA	b4397
dgoD	b4478	adiA	b4117
dgoD	b4478	alsE	b4085
dgoD	b4478	alsK	b4084
dgoD	b4478	arpA	b4017
dgoD	b4478	aslA	b3801
dgoD	b4478	bglB	b3721
dgoD	b4478	bglF	b3722
dgoD	b4478	bglG	b3723
dgoD	b4478	cbrA	b3690
dgoD	b4478	cmtB	b2934
dgoD	b4478	dcd	b2065
dgoK	b3693	agaS	b3136
dgoK	b3693	bglF	b3722
dgoK	b3693	dgoD	b4478
dgoR	b4479	ade	b3665
dgoT	b3691	aaeX	b3242
dgoT	b3691	acrF	b3266
dgoT	b3691	agaD	b3140
dgoT	b3691	bglB	b3721
dgoT	b3691	bglG	b3723
dgoT	b3691	bglH	b3720
dgoT	b3691	cbrA	b3690
dgoT	b3691	cbrB	b3716
dgoT	b3691	dcuD	b3227
dgoT	b3691	dgoD	b4478
dgoT	b3691	dgoK	b3693
dgsA	b1594	aphA	b4055
dgt	b160	argE	b3957
dgt	b160	bcsF	b3537
dhaK	b1200	cytR	b3934
dhaL	b1199	cytR	b3934
dhaL	b1199	dhaK	b1200
dhaM	b1198	dhaK	b1200
dhaM	b1198	dhaL	b1199
diaA	b3149	accB	b3255
diaA	b3149	alaS	b2697
diaA	b3149	atpA	b3734
diaA	b3149	atpB	b3738
diaA	b3149	atpD	b3732
diaA	b3149	atpG	b3733
diaA	b3149	bamD	b2595
diaA	b3149	crp	b3357
diaA	b3149	dapA	b2478
dicA	b1570	chpS	b4224
dicA	b1570	dcuD	b3227
dinD	b3645	araD	b61
dinD	b3645	araE	b2841
dinD	b3645	aroH	b1704
dinD	b3645	cho	b1741
dinD	b3645	dbpA	b1343
dinD	b3645	dinB	b231
dinF	b4044	abgB	b1337
dinF	b4044	abgR	b1339
dinF	b4044	araA	b62
dinF	b4044	araB	b63
dinF	b4044	araC	b64
dinF	b4044	araD	b61
dinF	b4044	araE	b2841
dinF	b4044	araF	b1901
[truncated: 63,536 more rows]

## Sheet: fmin=6
genename	bnumber	genename	bnumber
abgB	b1337	abgA	b1338
abgR	b1339	abgA	b1338
abgR	b1339	abgB	b1337
abgT	b1336	abgB	b1337
abgT	b1336	abgR	b1339
accC	b3256	accB	b3255
aceB	b4014	aceA	b4015
aceF	b115	aceE	b114
aceK	b4016	aceA	b4015
aceK	b4016	aceB	b4014
acrB	b462	acrA	b463
acs	b4069	aceA	b4015
actP	b4067	acs	b4069
adiC	b4115	adiA	b4117
adiY	b4116	adiC	b4115
afuC	b262	afuB	b263
agaD	b3140	agaB	b3138
agaD	b3140	agaC	b3139
agaI	b3141	agaB	b3138
agp	b1002	acs	b4069
aldA	b1415	acs	b4069
aldA	b1415	actP	b4067
aldA	b1415	agp	b1002
alkA	b2068	abgA	b1338
alkA	b2068	aegA	b2468
alsB	b4088	alsA	b4087
alsC	b4086	alsA	b4087
alsE	b4085	alsA	b4087
alsE	b4085	alsB	b4088
alsE	b4085	alsC	b4086
alsK	b4084	alsC	b4086
alsK	b4084	alsE	b4085
ampE	b111	ampD	b110
apaH	b49	ampD	b110
apaH	b49	ampE	b111
apaH	b49	apaG	b50
appB	b979	appA	b980
appC	b978	appA	b980
appC	b978	appB	b979
araB	b63	araA	b62
araC	b64	araA	b62
araC	b64	araB	b63
araD	b61	araA	b62
araD	b61	araB	b63
araD	b61	araC	b64
araE	b2841	araA	b62
araE	b2841	araB	b63
araE	b2841	araC	b64
araE	b2841	araD	b61
araF	b1901	araA	b62
araF	b1901	araB	b63
araF	b1901	araC	b64
araF	b1901	araD	b61
araF	b1901	araE	b2841
araG	b1900	araA	b62
araG	b1900	araB	b63
araG	b1900	araC	b64
araG	b1900	araD	b61
araG	b1900	araE	b2841
araG	b1900	araF	b1901
araH	b4460	araA	b62
araH	b4460	araB	b63
araH	b4460	araC	b64
araH	b4460	araD	b61
araH	b4460	araE	b2841
araH	b4460	araF	b1901
araH	b4460	araG	b1900
araJ	b396	araA	b62
araJ	b396	araB	b63
araJ	b396	araC	b64
araJ	b396	araD	b61
araJ	b396	araE	b2841
araJ	b396	araF	b1901
araJ	b396	araG	b1900
araJ	b396	araH	b4460
argB	b3959	argA	b2818
argC	b3958	argA	b2818
argC	b3958	argB	b3959
argD	b3359	argA	b2818
argD	b3359	argB	b3959
argD	b3359	argC	b3958
argE	b3957	argB	b3959
argE	b3957	argC	b3958
argF	b273	argA	b2818
argF	b273	argB	b3959
argF	b273	argC	b3958
argF	b273	argD	b3359
argG	b3172	argA	b2818
argG	b3172	argB	b3959
argG	b3172	argC	b3958
argG	b3172	argD	b3359
argG	b3172	argF	b273
argH	b3960	argA	b2818
argH	b3960	argB	b3959
argH	b3960	argC	b3958
argH	b3960	argD	b3359
argH	b3960	argF	b273
argH	b3960	argG	b3172
argI	b4254	argA	b2818
argI	b4254	argB	b3959
argI	b4254	argC	b3958
argI	b4254	argD	b3359
argI	b4254	argF	b273
argI	b4254	argG	b3172
argI	b4254	argH	b3960
argK	b2918	agaD	b3140
argK	b2918	agaI	b3141
argT	b2310	aldA	b1415
argW	b2348	argU	b536
argX	b3796	argU	b536
arnA	b2255	ais	b2252
arnB	b2253	ais	b2252
arnB	b2253	arnA	b2255
arnC	b2254	ais	b2252
arnC	b2254	arnA	b2255
arnC	b2254	arnB	b2253
arnD	b2256	ais	b2252
aroD	b1693	argE	b3957
aroD	b1693	aroA	b908
aroG	b754	aroA	b908
aroG	b754	aroD	b1693
aroK	b3390	aroB	b3389
aroL	b388	aroF	b2601
aroP	b112	argA	b2818
aroP	b112	argB	b3959
aroP	b112	argC	b3958
aroP	b112	argD	b3359
aroP	b112	argF	b273
aroP	b112	argG	b3172
aroP	b112	argH	b3960
aroP	b112	argI	b4254
aroP	b112	aroA	b908
aroP	b112	aroG	b754
arsC	b3503	arsB	b3502
arsR	b3501	agaC	b3139
artJ	b860	argA	b2818
artJ	b860	argB	b3959
artJ	b860	argC	b3958
artJ	b860	argD	b3359
artJ	b860	argF	b273
artJ	b860	argG	b3172
artJ	b860	argH	b3960
artJ	b860	argI	b4254
artJ	b860	aroA	b908
artJ	b860	aroP	b112
artM	b861	artI	b863
artP	b864	artI	b863
artP	b864	artM	b861
artQ	b862	artI	b863
artQ	b862	artM	b861
artQ	b862	artP	b864
asd	b3433	argE	b3957
asd	b3433	argP	b2916
asd	b3433	aroA	b908
asd	b3433	aroG	b754
aspA	b4139	ansB	b2957
aspA	b4139	aphA	b4055
astA	b1747	acs	b4069
astA	b1747	adhP	b1478
astB	b1745	acs	b4069
astB	b1745	adhP	b1478
astB	b1745	astA	b1747
astC	b1748	acs	b4069
astC	b1748	adhP	b1478
astC	b1748	astA	b1747
astC	b1748	astB	b1745
astD	b1746	adhP	b1478
astD	b1746	astA	b1747
astD	b1746	astB	b1745
astD	b1746	astC	b1748
astE	b1744	astA	b1747
astE	b1744	astB	b1745
astE	b1744	astC	b1748
astE	b1744	astD	b1746
atoS	b2219	agp	b1002
atoS	b2219	atoC	b2220
atpB	b3738	atpA	b3734
atpC	b3731	atpA	b3734
atpD	b3732	atpA	b3734
atpD	b3732	atpC	b3731
atpE	b3737	atpA	b3734
atpE	b3737	atpB	b3738
atpE	b3737	atpD	b3732
atpF	b3736	atpA	b3734
atpF	b3736	atpB	b3738
atpF	b3736	atpD	b3732
atpF	b3736	atpE	b3737
atpG	b3733	atpA	b3734
atpG	b3733	atpB	b3738
atpG	b3733	atpC	b3731
atpG	b3733	atpD	b3732
atpG	b3733	atpE	b3737
atpG	b3733	atpF	b3736
atpH	b3735	atpA	b3734
atpH	b3735	atpB	b3738
atpH	b3735	atpC	b3731
atpH	b3735	atpD	b3732
atpH	b3735	atpE	b3737
atpH	b3735	atpF	b3736
atpH	b3735	atpG	b3733
atpI	b3739	atpB	b3738
azoR	b1412	aroD	b1693
barA	b2786	ampC	b4150
basR	b4113	arnB	b2253
basR	b4113	arnC	b2254
basS	b4112	ais	b2252
basS	b4112	arnA	b2255
basS	b4112	arnB	b2253
basS	b4112	arnC	b2254
basS	b4112	arnD	b2256
basS	b4112	basR	b4113
bcsA	b3533	arsR	b3501
bcsB	b3532	bcsA	b3533
bcsF	b3537	bcsE	b3536
bcsG	b3538	bcsE	b3536
bcsG	b3538	bcsF	b3537
bcsZ	b3531	aaeB	b3240
bcsZ	b3531	bcsA	b3533
betB	b312	betA	b311
betI	b313	betA	b311
betI	b313	betB	b312
betT	b314	betA	b311
betT	b314	betB	b312
betT	b314	betI	b313
bfd	b3337	ansB	b2957
bglB	b3721	acrF	b3266
bglB	b3721	alsE	b4085
bglB	b3721	aslA	b3801
bglG	b3723	bglB	b3721
bglH	b3720	bglF	b3722
bioB	b775	artJ	b860
bioC	b777	argF	b273
bioC	b777	artJ	b860
bioC	b777	bioA	b774
bioC	b777	bioB	b775
bioD	b778	artJ	b860
bioD	b778	bioB	b775
bioD	b778	bioC	b777
bioF	b776	argF	b273
bioF	b776	bioA	b774
bioF	b776	bioB	b775
bioF	b776	bioC	b777
bioF	b776	bioD	b778
blc	b4149	bcsC	b3530
blc	b4149	bfr	b3336
btuE	b1710	amyA	b1927
btuE	b1710	btuD	b1709
btuR	b1270	anmK	b1640
cadA	b4131	adiY	b4116
cadA	b4131	araD	b61
cadB	b4132	adiY	b4116
cadB	b4132	cadA	b4131
caiE	b35	caiC	b37
caiT	b40	acrD	b2470
carA	b32	argD	b3359
carB	b33	argD	b3359
carB	b33	argG	b3172
carB	b33	carA	b32
cbl	b1987	amtB	b451
cbpA	b1000	aidB	b4187
cbpA	b1000	appA	b980
cbpA	b1000	appB	b979
cbpA	b1000	appC	b978
cbpM	b999	aidB	b4187
cbpM	b999	appB	b979
cbpM	b999	appC	b978
cbpM	b999	cbpA	b1000
cbrA	b3690	bglB	b3721
cbrA	b3690	bglG	b3723
cbrC	b3717	bglB	b3721
cbrC	b3717	cbrB	b3716
ccmB	b2200	ccmA	b2201
ccmC	b2199	ccmB	b2200
ccmD	b2198	btuC	b1711
ccmD	b2198	ccmC	b2199
ccmE	b2197	ccmB	b2200
ccmE	b2197	ccmC	b2199
ccmE	b2197	ccmD	b2198
ccmF	b2196	ccmB	b2200
ccmF	b2196	ccmC	b2199
ccmF	b2196	ccmE	b2197
ccmG	b2195	ccmC	b2199
ccmG	b2195	ccmE	b2197
ccmG	b2195	ccmF	b2196
ccmH	b2194	ccmF	b2196
ccmH	b2194	ccmG	b2195
cdh	b3918	ampC	b4150
cfa	b1661	cbpA	b1000
cfa	b1661	cbpM	b999
chaC	b1218	cfa	b1661
chbB	b1738	chbA	b1736
chbF	b1734	chbA	b1736
chbG	b1733	chbF	b1734
chbR	b1735	chbA	b1736
cheA	b1888	aer	b3072
cheB	b1883	aer	b3072
cheB	b1883	cheA	b1888
cheR	b1884	aer	b3072
cheR	b1884	cheA	b1888
cheR	b1884	cheB	b1883
cheW	b1887	aer	b3072
cheW	b1887	cheA	b1888
cheW	b1887	cheB	b1883
cheW	b1887	cheR	b1884
cheY	b1882	aer	b3072
cheY	b1882	cheA	b1888
cheY	b1882	cheB	b1883
cheY	b1882	cheR	b1884
cheY	b1882	cheW	b1887
cheZ	b1881	aer	b3072
cheZ	b1881	cheA	b1888
cheZ	b1881	cheB	b1883
cheZ	b1881	cheR	b1884
cheZ	b1881	cheW	b1887
cheZ	b1881	cheY	b1882
chpR	b2783	chpA	b2782
chpS	b4224	chpB	b4225
citE	b616	citC	b618
citF	b615	acrD	b2470
citF	b615	afuB	b263
citF	b615	caiT	b40
citF	b615	citC	b618
citF	b615	citE	b616
citG	b613	citF	b615
citT	b612	citE	b616
citT	b612	citF	b615
citX	b614	citD	b617
citX	b614	citE	b616
citX	b614	citF	b615
citX	b614	citG	b613
clcB	b1592	abgA	b1338
clpS	b881	clpA	b882
clpX	b438	clpP	b437
cls	b1249	aroD	b1693
cmoA	b1870	ansA	b1767
cmoB	b1871	cmoA	b1870
cmtA	b2933	aaeB	b3240
cmtB	b2934	bglB	b3721
cnu	b1625	blr	b4409
cobS	b1992	cls	b1249
cobT	b1991	cls	b1249
cobT	b1991	cobS	b1992
cobU	b1993	cobS	b1992
cobU	b1993	cobT	b1991
codA	b337	argA	b2818
codA	b337	argC	b3958
codA	b337	argD	b3359
codA	b337	argG	b3172
codA	b337	aroA	b908
codA	b337	aroP	b112
codA	b337	artJ	b860
codA	b337	carA	b32
codA	b337	carB	b33
codB	b336	argA	b2818
codB	b336	argC	b3958
codB	b336	argD	b3359
codB	b336	argG	b3172
codB	b336	aroA	b908
codB	b336	aroP	b112
codB	b336	artJ	b860
codB	b336	carA	b32
codB	b336	carB	b33
codB	b336	codA	b337
copA	b484	cfa	b1661
cpsB	b2049	aaeB	b3240
cpsB	b2049	abgA	b1338
cpsB	b2049	alkA	b2068
cpsB	b2049	ascB	b2716
cpsB	b2049	clcB	b1592
cpsB	b2049	cmtA	b2933
cpsG	b2048	alkA	b2068
cpsG	b2048	cmtA	b2933
cpsG	b2048	cpsB	b2049
creB	b4398	creA	b4397
csdE	b2811	csdA	b2810
csgE	b1039	csgD	b1040
csgF	b1038	csgD	b1040
csgF	b1038	csgE	b1039
csgG	b1037	csgD	b1040
csgG	b1037	csgE	b1039
csgG	b1037	csgF	b1038
csiD	b2659	adhP	b1478
csiD	b2659	astA	b1747
csiD	b2659	astB	b1745
csiD	b2659	astC	b1748
csiD	b2659	astD	b1746
csiE	b2535	agp	b1002
csiE	b2535	aldB	b3588
cspB	b1557	cspA	b3556
cspD	b880	agp	b1002
cspD	b880	aldA	b1415
cspF	b1558	cspB	b1557
cspG	b990	cspA	b3556
cspG	b990	cspB	b1557
cspG	b990	cspF	b1558
cspH	b989	cspB	b1557
cspH	b989	cspG	b990
cspI	b1552	cspB	b1557
cspI	b1552	cspG	b990
cspI	b1552	cspH	b989
csrA	b2696	crr	b2417
csrC	b4457	csrB	b4408
cstA	b598	acs	b4069
cstA	b598	actP	b4067
cstA	b598	agp	b1002
cstA	b598	aldA	b1415
cstA	b598	cspD	b880
cueR	b487	aidB	b4187
cueR	b487	cbpA	b1000
cueR	b487	cbpM	b999
cusB	b574	cusA	b575
cusC	b572	cusA	b575
cusC	b572	cusB	b574
cusF	b573	aroP	b112
cusF	b573	cusA	b575
cusF	b573	cusB	b574
cusF	b573	cusC	b572
cusR	b571	cusA	b575
cusR	b571	cusC	b572
cusR	b571	cusF	b573
cvpA	b2313	argG	b3172
cvpA	b2313	aroP	b112
cvpA	b2313	artJ	b860
cvpA	b2313	codA	b337
cvpA	b2313	codB	b336
cvrA	b1191	aspC	b928
cyaA	b3806	aaeR	b3243
cyaR	b4438	cstA	b598
cyaY	b3807	cdh	b3918
cybB	b1418	bglX	b2132
cybB	b1418	cobS	b1992
cybB	b1418	cobT	b1991
cycA	b4208	argT	b2310
cydB	b734	cydA	b733
cydD	b887	cydC	b886
cynT	b339	cynR	b338
cynX	b341	cynR	b338
cyoB	b431	cyoA	b432
cyoC	b430	cyoA	b432
cyoC	b430	cyoB	b431
cyoD	b429	cyoA	b432
cyoD	b429	cyoB	b431
cyoD	b429	cyoC	b430
cyoE	b428	cyoA	b432
cyoE	b428	cyoB	b431
cyoE	b428	cyoC	b430
cyoE	b428	cyoD	b429
cysC	b2750	cbl	b1987
cysC	b2750	cysA	b2422
cysD	b2752	cbl	b1987
cysD	b2752	cysA	b2422
cysD	b2752	cysC	b2750
cysG	b3368	ccmA	b2201
cysH	b2762	cysA	b2422
cysH	b2762	cysC	b2750
cysH	b2762	cysD	b2752
cysI	b2763	cysA	b2422
cysI	b2763	cysC	b2750
cysI	b2763	cysD	b2752
cysI	b2763	cysH	b2762
cysJ	b2764	cysA	b2422
cysJ	b2764	cysC	b2750
cysJ	b2764	cysD	b2752
cysJ	b2764	cysH	b2762
cysJ	b2764	cysI	b2763
cysK	b2414	cysA	b2422
cysK	b2414	cysC	b2750
cysK	b2414	cysD	b2752
cysK	b2414	cysH	b2762
cysK	b2414	cysI	b2763
cysK	b2414	cysJ	b2764
cysM	b2421	argF	b273
cysM	b2421	aroG	b754
cysM	b2421	artJ	b860
cysM	b2421	codA	b337
cysM	b2421	codB	b336
cysM	b2421	cysA	b2422
cysM	b2421	cysC	b2750
cysM	b2421	cysD	b2752
cysM	b2421	cysH	b2762
cysM	b2421	cysI	b2763
cysM	b2421	cysJ	b2764
cysM	b2421	cysK	b2414
cysN	b2751	cbl	b1987
cysN	b2751	cysA	b2422
cysN	b2751	cysC	b2750
cysN	b2751	cysD	b2752
cysN	b2751	cysH	b2762
cysN	b2751	cysI	b2763
cysN	b2751	cysJ	b2764
cysN	b2751	cysK	b2414
cysN	b2751	cysM	b2421
cysP	b2425	cbl	b1987
cysP	b2425	cysA	b2422
cysP	b2425	cysC	b2750
cysP	b2425	cysD	b2752
cysP	b2425	cysH	b2762
cysP	b2425	cysI	b2763
cysP	b2425	cysJ	b2764
cysP	b2425	cysK	b2414
cysP	b2425	cysM	b2421
cysP	b2425	cysN	b2751
cysQ	b4214	bolA	b435
cysT	b1910	argU	b536
cysT	b1910	argW	b2348
cysT	b1910	argX	b3796
cysU	b2424	cbl	b1987
cysU	b2424	cysA	b2422
cysU	b2424	cysC	b2750
cysU	b2424	cysD	b2752
cysU	b2424	cysH	b2762
cysU	b2424	cysI	b2763
cysU	b2424	cysJ	b2764
cysU	b2424	cysK	b2414
cysU	b2424	cysM	b2421
cysU	b2424	cysN	b2751
cysU	b2424	cysP	b2425
cysW	b2423	cbl	b1987
cysW	b2423	cysA	b2422
cysW	b2423	cysC	b2750
cysW	b2423	cysD	b2752
cysW	b2423	cysH	b2762
cysW	b2423	cysI	b2763
cysW	b2423	cysJ	b2764
cysW	b2423	cysK	b2414
cysW	b2423	cysM	b2421
cysW	b2423	cysN	b2751
cysW	b2423	cysP	b2425
cysW	b2423	cysU	b2424
dadA	b1189	aldA	b1415
dadA	b1189	argT	b2310
dadA	b1189	astC	b1748
dadA	b1189	cstA	b598
dadX	b1190	aldA	b1415
dadX	b1190	cstA	b598
dadX	b1190	dadA	b1189
dapB	b31	argG	b3172
dapB	b31	asd	b3433
dapD	b166	bcp	b2480
dapD	b166	dapB	b31
dbpA	b1343	abgA	b1338
dbpA	b1343	abgB	b1337
dbpA	b1343	abgR	b1339
dbpA	b1343	abgT	b1336
dcp	b1538	amn	b1982
dcp	b1538	btuR	b1270
dctA	b3528	aldA	b1415
dctA	b3528	aphA	b4055
dctA	b3528	aspA	b4139
dctR	b3507	aidB	b4187
dcuA	b4138	ansB	b2957
dcuA	b4138	aspA	b4139
dcuA	b4138	cydA	b733
dcuA	b4138	cydB	b734
dcuB	b4123	ansB	b2957
dcuB	b4123	bfd	b3337
dcuB	b4123	dcuA	b4138
dcuC	b621	ansB	b2957
dcuC	b621	dcuB	b4123
dcyD	b1919	cysK	b2414
dcyD	b1919	cysN	b2751
ddpB	b1486	ddpA	b1487
ddpC	b1485	astE	b1744
ddpC	b1485	ddpB	b1486
ddpD	b1484	astE	b1744
ddpD	b1484	ddpA	b1487
ddpD	b1484	ddpC	b1485
ddpF	b1483	ddpC	b1485
ddpF	b1483	ddpD	b1484
ddpX	b1488	astA	b1747
ddpX	b1488	astC	b1748
ddpX	b1488	ddpA	b1487
ddpX	b1488	ddpD	b1484
deoB	b4383	deoA	b4382
deoC	b4381	cdd	b2143
deoC	b4381	deoA	b4382
deoC	b4381	deoB	b4383
deoD	b4384	deoA	b4382
deoD	b4384	deoB	b4383
deoD	b4384	deoC	b4381
der	b2511	bamB	b2512
dgoD	b4478	arpA	b4017
dgoD	b4478	bglB	b3721
dgoD	b4478	bglG	b3723
dgoT	b3691	acrF	b3266
dgoT	b3691	bglB	b3721
dhaL	b1199	dhaK	b1200
dhaM	b1198	dhaK	b1200
dhaM	b1198	dhaL	b1199
dinD	b3645	dinB	b231
dinF	b4044	araB	b63
dinF	b4044	araD	b61
dinF	b4044	araE	b2841
dinF	b4044	araJ	b396
dinF	b4044	dinB	b231
dinF	b4044	dinD	b3645
dinG	b799	dinB	b231
dinG	b799	dinF	b4044
dinI	b1061	cho	b1741
dinI	b1061	dinB	b231
dinI	b1061	dinD	b3645
dinI	b1061	dinF	b4044
dinI	b1061	dinG	b799
dinQ	b4613	dinI	b1061
dipZ	b4136	cutA	b4137
dkgA	b3012	blc	b4149
dld	b2133	amn	b1982
dld	b2133	asd	b3433
dld	b2133	aspC	b928
dld	b2133	dcp	b1538
dmsA	b894	ansB	b2957
dmsA	b894	dcuA	b4138
dmsA	b894	dcuB	b4123
dmsA	b894	dcuC	b621
dmsB	b895	ansB	b2957
dmsB	b895	dcuB	b4123
dmsB	b895	dcuC	b621
dmsB	b895	dmsA	b894
dmsC	b896	dmsA	b894
dmsC	b896	dmsB	b895
dnaJ	b15	clpB	b2592
dnaK	b14	clpB	b2592
dnaK	b14	dnaJ	b15
dnaN	b3701	dnaA	b3702
dnaT	b4362	dnaC	b4361
dppA	b3544	aceA	b4015
dppB	b3543	dppA	b3544
dppC	b3542	dppA	b3544
dppC	b3542	dppB	b3543
dppD	b3541	dppA	b3544
dppD	b3541	dppB	b3543
dppD	b3541	dppC	b3542
dppF	b3540	dppA	b3544
dppF	b3540	dppB	b3543
dppF	b3540	dppC	b3542
dppF	b3540	dppD	b3541
dps	b812	adhP	b1478
dps	b812	bfr	b3336
dps	b812	blc	b4149
dps	b812	dkgA	b3012
dsbB	b1185	btuC	b1711
dsbB	b1185	cld	b2027
dsdC	b2364	dsdA	b2366
dsdX	b2365	dsdA	b2366
dsrB	b1952	bolA	b435
dtpB	b3496	aphA	b4055
dusB	b3260	apt	b469
dusC	b2140	cmr	b842
dut	b3640	dfp	b3639
eamA	b1533	cls	b1249
eamA	b1533	cobT	b1991
eamA	b1533	csgG	b1037
ebgC	b3077	agaV	b3133
ecnB	b4411	bfr	b3336
ecnB	b4411	blc	b4149
ecnB	b4411	bolA	b435
eco	b2209	argC	b3958
eco	b2209	argD	b3359
eco	b2209	argF	b273
eco	b2209	argG	b3172
eco	b2209	argH	b3960
eco	b2209	aroP	b112
edd	b1851	eda	b1850
efeB	b1019	cirA	b2155
efeO	b1018	cirA	b2155
efeO	b1018	efeB	b1019
efeU	b4490	bfd	b3337
efeU	b4490	efeB	b1019
efeU	b4490	efeO	b1018
elaB	b2266	amyA	b1927
elaB	b2266	bfr	b3336
elaB	b2266	blc	b4149
elaB	b2266	dkgA	b3012
elaB	b2266	dps	b812
elaB	b2266	ecnB	b4411
emrB	b2686	ampG	b433
emtA	b1193	dsbB	b1185
entA	b596	cirA	b2155
entB	b595	cirA	b2155
entB	b595	entA	b596
entC	b593	cirA	b2155
entC	b593	efeU	b4490
entC	b593	entA	b596
entC	b593	entB	b595
entD	b583	cirA	b2155
entD	b583	entA	b596
entD	b583	entB	b595
entD	b583	entC	b593
entE	b594	cirA	b2155
entE	b594	entA	b596
entE	b594	entB	b595
entE	b594	entC	b593
entE	b594	entD	b583
entF	b586	cirA	b2155
entF	b586	entA	b596
entF	b586	entB	b595
entF	b586	entC	b593
entF	b586	entD	b583
entF	b586	entE	b594
entS	b591	cirA	b2155
entS	b591	efeB	b1019
entS	b591	efeU	b4490
entS	b591	entB	b595
entS	b591	entC	b593
entS	b591	entE	b594
entS	b591	entF	b586
envR	b3264	acrF	b3266
eptA	b4114	arnB	b2253
eptA	b4114	arnC	b2254
eptA	b4114	basR	b4113
eptA	b4114	basS	b4112
eptB	b3546	envZ	b3404
erpA	b156	cobU	b1993
essD	b554	arrD	b555
eutC	b2440	eutB	b2441
eutE	b2455	eutA	b2451
eutH	b2452	eutE	b2455
eutJ	b2454	eutG	b2453
eutK	b2438	alkA	b2068
eutL	b2439	eutC	b2440
eutL	b2439	eutK	b2438
eutM	b2457	cpsB	b2049
eutM	b2457	cpsG	b2048
eutN	b2456	eutG	b2453
eutQ	b2460	eutP	b2461
eutT	b2459	eutD	b2458
exbB	b3006	bfd	b3337
exbB	b3006	cirA	b2155
exbB	b3006	efeO	b1018
exbB	b3006	efeU	b4490
exbB	b3006	entA	b596
exbB	b3006	entB	b595
exbB	b3006	entC	b593
exbB	b3006	entE	b594
exbB	b3006	entF	b586
exbD	b3005	bfd	b3337
exbD	b3005	cirA	b2155
exbD	b3005	efeO	b1018
exbD	b3005	efeU	b4490
exbD	b3005	entA	b596
exbD	b3005	entB	b595
exbD	b3005	entC	b593
exbD	b3005	entE	b594
exbD	b3005	exbB	b3006
exoX	b1844	aroD	b1693
exoX	b1844	cls	b1249
exuR	b3094	chpR	b2783
fabH	b1091	fabD	b1092
fabR	b3963	dcuS	b4125
fadA	b3845	acs	b4069
fadA	b3845	actP	b4067
fadA	b3845	aldA	b1415
fadA	b3845	astA	b1747
fadA	b3845	astC	b1748
fadA	b3845	cstA	b598
fadB	b3846	acs	b4069
fadB	b3846	aldA	b1415
fadB	b3846	astA	b1747
fadB	b3846	astC	b1748
fadB	b3846	dadA	b1189
fadB	b3846	fadA	b3845
fadE	b221	fadA	b3845
fadE	b221	fadD	b1805
fadH	b3081	fadA	b3845
fadI	b2342	acs	b4069
fadI	b2342	agp	b1002
fadI	b2342	aldA	b1415
fadI	b2342	astA	b1747
fadI	b2342	astB	b1745
fadI	b2342	astC	b1748
fadI	b2342	astD	b1746
fadI	b2342	cstA	b598
fadI	b2342	dadA	b1189
fadI	b2342	dadX	b1190
fadI	b2342	fadA	b3845
fadI	b2342	fadB	b3846
fadI	b2342	fadE	b221
fadI	b2342	fadH	b3081
fadJ	b2341	acs	b4069
fadJ	b2341	agp	b1002
fadJ	b2341	aldA	b1415
fadJ	b2341	aldB	b3588
fadJ	b2341	csiE	b2535
fadJ	b2341	cstA	b598
fadJ	b2341	dadA	b1189
fadJ	b2341	fadA	b3845
fadJ	b2341	fadB	b3846
fadJ	b2341	fadI	b2342
fadK	b1701	chbR	b1735
fbaA	b2925	eno	b2779
fbaB	b2097	amyA	b1927
fbaB	b2097	bfr	b3336
fbaB	b2097	dps	b812
fbaB	b2097	elaB	b2266
fcl	b2052	aaeB	b3240
fcl	b2052	abgA	b1338
fcl	b2052	ccmA	b2201
fcl	b2052	cpsB	b2049
fcl	b2052	cpsG	b2048
fcl	b2052	eutH	b2452
fcl	b2052	eutM	b2457
fdnH	b1475	ccmA	b2201
fdnH	b1475	cpsB	b2049
fdnH	b1475	fdnG	b1474
fdnI	b1476	fdnG	b1474
fdoG	b3894	cusC	b572
fdoG	b3894	eco	b2209
fdoG	b3894	fdhE	b3891
fdoH	b3893	fdhE	b3891
fdoH	b3893	fdoG	b3894
fdoI	b3892	fdhE	b3891
fdoI	b3892	fdoG	b3894
fdoI	b3892	fdoH	b3893
fdrA	b518	aaaD	b4634
fdrA	b518	caiD	b36
feaB	b1385	alkA	b2068
feaR	b1384	aldA	b1415
feaR	b1384	cstA	b598
fecB	b4290	fecA	b4291
fecC	b4289	fecA	b4291
fecC	b4289	fecB	b4290
fecD	b4288	fecA	b4291
fecD	b4288	fecB	b4290
fecD	b4288	fecC	b4289
fecE	b4287	fecA	b4291
fecE	b4287	fecB	b4290
fecE	b4287	fecC	b4289
fecE	b4287	fecD	b4288
fecI	b4293	bfd	b3337
fecI	b4293	cirA	b2155
fecI	b4293	efeO	b1018
fecI	b4293	entA	b596
fecI	b4293	entB	b595
fecI	b4293	entC	b593
fecI	b4293	entD	b583
fecI	b4293	entE	b594
fecI	b4293	entF	b586
fecI	b4293	exbB	b3006
fecI	b4293	exbD	b3005
fecR	b4292	cirA	b2155
fecR	b4292	entA	b596
fecR	b4292	entB	b595
fecR	b4292	entC	b593
fecR	b4292	entE	b594
fecR	b4292	entF	b586
fecR	b4292	exbB	b3006
fecR	b4292	exbD	b3005
fecR	b4292	fecI	b4293
feoA	b3408	exbD	b3005
feoB	b3409	feoA	b3408
feoC	b3410	feoA	b3408
feoC	b3410	feoB	b3409
fepA	b584	cirA	b2155
fepA	b584	efeB	b1019
fepA	b584	entA	b596
fepA	b584	entB	b595
fepA	b584	entC	b593
fepA	b584	entD	b583
fepA	b584	entE	b594
fepA	b584	entF	b586
fepA	b584	entS	b591
fepA	b584	exbB	b3006
fepA	b584	exbD	b3005
fepA	b584	fecI	b4293
fepA	b584	fecR	b4292
fepB	b592	cirA	b2155
fepB	b592	entA	b596
fepB	b592	entB	b595
fepB	b592	entC	b593
fepB	b592	entD	b583
fepB	b592	entE	b594
fepB	b592	entF	b586
fepB	b592	entS	b591
fepB	b592	exbB	b3006
fepB	b592	exbD	b3005
fepB	b592	fecI	b4293
fepB	b592	fecR	b4292
fepB	b592	fepA	b584
fepC	b588	cirA	b2155
fepC	b588	efeB	b1019
fepC	b588	entA	b596
fepC	b588	entB	b595
fepC	b588	entC	b593
fepC	b588	entE	b594
fepC	b588	entF	b586
fepC	b588	entS	b591
fepC	b588	fecR	b4292
fepC	b588	fepA	b584
fepC	b588	fepB	b592
fepD	b590	entA	b596
fepD	b590	entB	b595
fepD	b590	entC	b593
fepD	b590	entE	b594
fepD	b590	entF	b586
fepD	b590	entS	b591
fepD	b590	fecR	b4292
fepD	b590	fepB	b592
fepD	b590	fepC	b588
fepG	b589	cirA	b2155
fepG	b589	entA	b596
fepG	b589	entB	b595
fepG	b589	entC	b593
fepG	b589	entE	b594
fepG	b589	entF	b586
fepG	b589	entS	b591
fepG	b589	fecR	b4292
fepG	b589	fepB	b592
fepG	b589	fepC	b588
fepG	b589	fepD	b590
fes	b585	bfd	b3337
fes	b585	cirA	b2155
fes	b585	entA	b596
fes	b585	entB	b595
fes	b585	entC	b593
fes	b585	entD	b583
fes	b585	entE	b594
fes	b585	entF	b586
fes	b585	entS	b591
fes	b585	fecI	b4293
fes	b585	fecR	b4292
fes	b585	fepA	b584
fes	b585	fepB	b592
fes	b585	fepC	b588
fes	b585	fepD	b590
fes	b585	fepG	b589
fhuA	b150	entC	b593
fhuA	b150	exbB	b3006
fhuA	b150	exbD	b3005
fhuA	b150	fecI	b4293
fhuA	b150	fecR	b4292
fhuA	b150	fepG	b589
fhuB	b153	fecD	b4288
fhuB	b153	fhuA	b150
fhuC	b151	entC	b593
fhuC	b151	exbB	b3006
fhuC	b151	exbD	b3005
fhuC	b151	fecR	b4292
fhuC	b151	fhuA	b150
fhuC	b151	fhuB	b153
fhuD	b152	entC	b593
fhuD	b152	exbB	b3006
fhuD	b152	fecR	b4292
fhuD	b152	fepG	b589
fhuD	b152	fhuA	b150
fhuD	b152	fhuB	b153
fhuD	b152	fhuC	b151
fhuE	b1102	cirA	b2155
fhuE	b1102	entA	b596
fhuE	b1102	entB	b595
fhuE	b1102	entC	b593
fhuE	b1102	entD	b583
fhuE	b1102	entE	b594
fhuE	b1102	entF	b586
fhuE	b1102	fepA	b584
fhuE	b1102	fepB	b592
fhuE	b1102	fes	b585
fhuF	b4367	bfd	b3337
fhuF	b4367	cirA	b2155
fhuF	b4367	dmsB	b895
fhuF	b4367	efeO	b1018
fhuF	b4367	efeU	b4490
fhuF	b4367	entA	b596
fhuF	b4367	entB	b595
fhuF	b4367	entC	b593
fhuF	b4367	entE	b594
fhuF	b4367	entF	b586
fhuF	b4367	exbB	b3006
fhuF	b4367	exbD	b3005
fhuF	b4367	fecI	b4293
fhuF	b4367	fecR	b4292
fhuF	b4367	fepA	b584
fhuF	b4367	fepB	b592
fhuF	b4367	fes	b585
fhuF	b4367	fhuA	b150
fhuF	b4367	fhuC	b151
fic	b3361	adhP	b1478
fic	b3361	bcsC	b3530
fic	b3361	bfr	b3336
fic	b3361	blc	b4149
fic	b3361	dkgA	b3012
fic	b3361	dps	b812
fic	b3361	ecnB	b4411
fic	b3361	elaB	b2266
fic	b3361	fbaB	b2097
fimC	b4316	fimA	b4314
fimD	b4317	fimC	b4316
fimF	b4318	fimA	b4314
fimF	b4318	fimC	b4316
fimF	b4318	fimD	b4317
fimG	b4319	fimA	b4314
fimG	b4319	fimC	b4316
fimG	b4319	fimD	b4317
fimG	b4319	fimF	b4318
fimH	b4320	fimD	b4317
fimH	b4320	fimF	b4318
fimH	b4320	fimG	b4319
fimI	b4315	fimA	b4314
fimI	b4315	fimC	b4316
fimI	b4315	fimD	b4317
fimI	b4315	fimF	b4318
fimI	b4315	fimG	b4319
fis	b3261	apt	b469
fis	b3261	dusB	b3260
fiu	b805	cirA	b2155
fiu	b805	efeB	b1019
fiu	b805	efeO	b1018
fiu	b805	efeU	b4490
fiu	b805	entA	b596
fiu	b805	entB	b595
fiu	b805	entC	b593
fiu	b805	entD	b583
fiu	b805	entE	b594
fiu	b805	entF	b586
fiu	b805	exbB	b3006
fiu	b805	exbD	b3005
fiu	b805	fecI	b4293
fiu	b805	fecR	b4292
fiu	b805	fepA	b584
fiu	b805	fepB	b592
fiu	b805	fepC	b588
fiu	b805	fepG	b589
fiu	b805	fes	b585
fiu	b805	fhuE	b1102
fiu	b805	fhuF	b4367
fixA	b41	caiT	b40
fixB	b42	caiT	b40
fixB	b42	fdrA	b518
fixB	b42	fixA	b41
fixC	b43	ecpD	b140
fixC	b43	fixB	b42
fixX	b44	fdrA	b518
fixX	b44	fixB	b42
fixX	b44	fixC	b43
fkpA	b3347	bamD	b2595
fkpA	b3347	dsbA	b3860
flgA	b1072	aer	b3072
flgA	b1072	cheA	b1888
flgA	b1072	cheB	b1883
flgA	b1072	cheR	b1884
flgA	b1072	cheW	b1887
flgA	b1072	cheY	b1882
flgA	b1072	cheZ	b1881
flgB	b1073	aer	b3072
flgB	b1073	cheA	b1888
flgB	b1073	cheB	b1883
flgB	b1073	cheR	b1884
flgB	b1073	cheW	b1887
flgB	b1073	cheY	b1882
flgB	b1073	cheZ	b1881
flgB	b1073	flgA	b1072
flgC	b1074	aer	b3072
flgC	b1074	cheA	b1888
flgC	b1074	cheB	b1883
flgC	b1074	cheR	b1884
flgC	b1074	cheW	b1887
flgC	b1074	cheY	b1882
flgC	b1074	cheZ	b1881
flgC	b1074	flgA	b1072
flgC	b1074	flgB	b1073
flgD	b1075	aer	b3072
flgD	b1075	cheA	b1888
flgD	b1075	cheB	b1883
flgD	b1075	cheR	b1884
flgD	b1075	cheW	b1887
flgD	b1075	cheY	b1882
flgD	b1075	cheZ	b1881
flgD	b1075	flgA	b1072
flgD	b1075	flgB	b1073
flgD	b1075	flgC	b1074
flgE	b1076	aer	b3072
flgE	b1076	cheA	b1888
flgE	b1076	cheB	b1883
flgE	b1076	cheR	b1884
flgE	b1076	cheW	b1887
flgE	b1076	cheY	b1882
flgE	b1076	cheZ	b1881
flgE	b1076	flgA	b1072
flgE	b1076	flgB	b1073
flgE	b1076	flgC	b1074
flgE	b1076	flgD	b1075
flgF	b1077	aer	b3072
flgF	b1077	cheA	b1888
flgF	b1077	cheB	b1883
flgF	b1077	cheR	b1884
flgF	b1077	cheW	b1887
flgF	b1077	cheY	b1882
flgF	b1077	cheZ	b1881
flgF	b1077	flgA	b1072
flgF	b1077	flgB	b1073
flgF	b1077	flgC	b1074
flgF	b1077	flgD	b1075
flgF	b1077	flgE	b1076
flgG	b1078	aer	b3072
flgG	b1078	cheA	b1888
flgG	b1078	cheB	b1883
flgG	b1078	cheR	b1884
flgG	b1078	cheW	b1887
flgG	b1078	cheY	b1882
flgG	b1078	cheZ	b1881
flgG	b1078	flgA	b1072
flgG	b1078	flgB	b1073
flgG	b1078	flgC	b1074
flgG	b1078	flgD	b1075
flgG	b1078	flgE	b1076
flgG	b1078	flgF	b1077
flgH	b1079	aer	b3072
flgH	b1079	cheA	b1888
flgH	b1079	cheB	b1883
flgH	b1079	cheR	b1884
flgH	b1079	cheW	b1887
flgH	b1079	cheY	b1882
flgH	b1079	cheZ	b1881
flgH	b1079	flgA	b1072
flgH	b1079	flgB	b1073
flgH	b1079	flgC	b1074
flgH	b1079	flgD	b1075
flgH	b1079	flgE	b1076
flgH	b1079	flgF	b1077
flgH	b1079	flgG	b1078
flgI	b1080	aer	b3072
flgI	b1080	cheA	b1888
flgI	b1080	cheB	b1883
flgI	b1080	cheR	b1884
flgI	b1080	cheW	b1887
flgI	b1080	cheY	b1882
flgI	b1080	cheZ	b1881
flgI	b1080	flgA	b1072
flgI	b1080	flgB	b1073
flgI	b1080	flgC	b1074
flgI	b1080	flgD	b1075
flgI	b1080	flgE	b1076
flgI	b1080	flgF	b1077
flgI	b1080	flgG	b1078
flgI	b1080	flgH	b1079
flgJ	b1081	aer	b3072
flgJ	b1081	cheA	b1888
flgJ	b1081	cheB	b1883
flgJ	b1081	cheR	b1884
flgJ	b1081	cheW	b1887
flgJ	b1081	cheY	b1882
flgJ	b1081	cheZ	b1881
flgJ	b1081	flgA	b1072
flgJ	b1081	flgB	b1073
flgJ	b1081	flgC	b1074
flgJ	b1081	flgD	b1075
flgJ	b1081	flgE	b1076
flgJ	b1081	flgF	b1077
flgJ	b1081	flgG	b1078
flgJ	b1081	flgH	b1079
flgJ	b1081	flgI	b1080
flgK	b1082	aer	b3072
flgK	b1082	cheA	b1888
flgK	b1082	cheB	b1883
flgK	b1082	cheR	b1884
flgK	b1082	cheW	b1887
flgK	b1082	cheY	b1882
flgK	b1082	cheZ	b1881
flgK	b1082	flgA	b1072
flgK	b1082	flgB	b1073
flgK	b1082	flgC	b1074
flgK	b1082	flgD	b1075
flgK	b1082	flgE	b1076
flgK	b1082	flgF	b1077
flgK	b1082	flgG	b1078
flgK	b1082	flgH	b1079
flgK	b1082	flgI	b1080
flgK	b1082	flgJ	b1081
flgL	b1083	aer	b3072
flgL	b1083	cheA	b1888
flgL	b1083	cheB	b1883
flgL	b1083	cheR	b1884
flgL	b1083	cheW	b1887
flgL	b1083	cheY	b1882
flgL	b1083	cheZ	b1881
flgL	b1083	flgA	b1072
flgL	b1083	flgB	b1073
flgL	b1083	flgC	b1074
flgL	b1083	flgD	b1075
flgL	b1083	flgE	b1076
flgL	b1083	flgF	b1077
flgL	b1083	flgG	b1078
flgL	b1083	flgH	b1079
flgL	b1083	flgI	b1080
flgL	b1083	flgJ	b1081
flgL	b1083	flgK	b1082
flgM	b1071	aer	b3072
flgM	b1071	cheA	b1888
flgM	b1071	cheB	b1883
flgM	b1071	cheR	b1884
flgM	b1071	cheW	b1887
flgM	b1071	cheY	b1882
flgM	b1071	cheZ	b1881
flgM	b1071	flgA	b1072
flgM	b1071	flgB	b1073
flgM	b1071	flgC	b1074
flgM	b1071	flgD	b1075
flgM	b1071	flgE	b1076
flgM	b1071	flgF	b1077
flgM	b1071	flgG	b1078
flgM	b1071	flgH	b1079
flgM	b1071	flgI	b1080
flgM	b1071	flgJ	b1081
flgM	b1071	flgK	b1082
flgM	b1071	flgL	b1083
flgN	b1070	aer	b3072
flgN	b1070	cheA	b1888
flgN	b1070	cheB	b1883
flgN	b1070	cheR	b1884
flgN	b1070	cheW	b1887
flgN	b1070	cheY	b1882
flgN	b1070	cheZ	b1881
flgN	b1070	flgA	b1072
flgN	b1070	flgB	b1073
flgN	b1070	flgC	b1074
flgN	b1070	flgD	b1075
flgN	b1070	flgE	b1076
flgN	b1070	flgF	b1077
flgN	b1070	flgG	b1078
flgN	b1070	flgH	b1079
flgN	b1070	flgI	b1080
flgN	b1070	flgJ	b1081
flgN	b1070	flgK	b1082
flgN	b1070	flgL	b1083
flgN	b1070	flgM	b1071
flhA	b1879	aer	b3072
flhA	b1879	cheA	b1888
flhA	b1879	cheB	b1883
flhA	b1879	cheR	b1884
flhA	b1879	cheW	b1887
flhA	b1879	cheY	b1882
flhA	b1879	cheZ	b1881
flhA	b1879	flgA	b1072
flhA	b1879	flgB	b1073
flhA	b1879	flgC	b1074
flhA	b1879	flgD	b1075
flhA	b1879	flgE	b1076
flhA	b1879	flgF	b1077
flhA	b1879	flgG	b1078
flhA	b1879	flgH	b1079
flhA	b1879	flgI	b1080
flhA	b1879	flgJ	b1081
flhA	b1879	flgK	b1082
flhA	b1879	flgL	b1083
flhA	b1879	flgM	b1071
flhA	b1879	flgN	b1070
flhB	b1880	aer	b3072
flhB	b1880	cheA	b1888
flhB	b1880	cheB	b1883
flhB	b1880	cheR	b1884
flhB	b1880	cheW	b1887
flhB	b1880	cheY	b1882
flhB	b1880	cheZ	b1881
flhB	b1880	flgA	b1072
flhB	b1880	flgB	b1073
flhB	b1880	flgC	b1074
flhB	b1880	flgD	b1075
flhB	b1880	flgE	b1076
flhB	b1880	flgF	b1077
flhB	b1880	flgG	b1078
flhB	b1880	flgH	b1079
flhB	b1880	flgI	b1080
flhB	b1880	flgJ	b1081
flhB	b1880	flgK	b1082
flhB	b1880	flgL	b1083
flhB	b1880	flgM	b1071
flhB	b1880	flgN	b1070
flhB	b1880	flhA	b1879
flhC	b1891	aer	b3072
flhC	b1891	cheA	b1888
flhC	b1891	cheB	b1883
flhC	b1891	cheR	b1884
flhC	b1891	cheW	b1887
flhC	b1891	cheY	b1882
flhC	b1891	cheZ	b1881
flhC	b1891	flgA	b1072
flhC	b1891	flgB	b1073
flhC	b1891	flgC	b1074
flhC	b1891	flgD	b1075
flhC	b1891	flgE	b1076
flhC	b1891	flgF	b1077
flhC	b1891	flgG	b1078
flhC	b1891	flgH	b1079
flhC	b1891	flgI	b1080
flhC	b1891	flgJ	b1081
flhC	b1891	flgK	b1082
flhC	b1891	flgL	b1083
flhC	b1891	flgM	b1071
flhC	b1891	flgN	b1070
flhC	b1891	flhA	b1879
flhC	b1891	flhB	b1880
flhD	b1892	aer	b3072
flhD	b1892	cheA	b1888
flhD	b1892	cheB	b1883
flhD	b1892	cheR	b1884
flhD	b1892	cheW	b1887
flhD	b1892	cheY	b1882
flhD	b1892	cheZ	b1881
flhD	b1892	flgA	b1072
flhD	b1892	flgB	b1073
flhD	b1892	flgC	b1074
flhD	b1892	flgD	b1075
flhD	b1892	flgE	b1076
flhD	b1892	flgF	b1077
flhD	b1892	flgG	b1078
flhD	b1892	flgH	b1079
flhD	b1892	flgI	b1080
flhD	b1892	flgJ	b1081
flhD	b1892	flgK	b1082
flhD	b1892	flgL	b1083
flhD	b1892	flgM	b1071
flhD	b1892	flgN	b1070
flhD	b1892	flhA	b1879
flhD	b1892	flhB	b1880
flhD	b1892	flhC	b1891
flhE	b1878	cheA	b1888
flhE	b1878	cheB	b1883
flhE	b1878	cheR	b1884
flhE	b1878	cheW	b1887
flhE	b1878	cheY	b1882
flhE	b1878	cheZ	b1881
flhE	b1878	flgA	b1072
flhE	b1878	flgB	b1073
flhE	b1878	flgC	b1074
flhE	b1878	flgD	b1075
flhE	b1878	flgE	b1076
flhE	b1878	flgF	b1077
flhE	b1878	flgG	b1078
flhE	b1878	flgH	b1079
flhE	b1878	flgI	b1080
flhE	b1878	flgJ	b1081
flhE	b1878	flgK	b1082
flhE	b1878	flgL	b1083
flhE	b1878	flgM	b1071
flhE	b1878	flgN	b1070
flhE	b1878	flhA	b1879
flhE	b1878	flhB	b1880
flhE	b1878	flhC	b1891
flhE	b1878	flhD	b1892
fliA	b1922	aer	b3072
fliA	b1922	cheA	b1888
fliA	b1922	cheB	b1883
fliA	b1922	cheR	b1884
fliA	b1922	cheW	b1887
fliA	b1922	cheY	b1882
fliA	b1922	cheZ	b1881
fliA	b1922	flgA	b1072
fliA	b1922	flgB	b1073
fliA	b1922	flgC	b1074
fliA	b1922	flgD	b1075
fliA	b1922	flgE	b1076
fliA	b1922	flgF	b1077
fliA	b1922	flgG	b1078
fliA	b1922	flgH	b1079
fliA	b1922	flgI	b1080
fliA	b1922	flgJ	b1081
fliA	b1922	flgK	b1082
fliA	b1922	flgL	b1083
fliA	b1922	flgM	b1071
fliA	b1922	flgN	b1070
fliA	b1922	flhA	b1879
fliA	b1922	flhB	b1880
fliA	b1922	flhC	b1891
fliA	b1922	flhD	b1892
fliA	b1922	flhE	b1878
fliC	b1923	aer	b3072
fliC	b1923	cheA	b1888
fliC	b1923	cheB	b1883
fliC	b1923	cheR	b1884
fliC	b1923	cheW	b1887
fliC	b1923	cheY	b1882
fliC	b1923	cheZ	b1881
fliC	b1923	flgA	b1072
fliC	b1923	flgB	b1073
fliC	b1923	flgC	b1074
fliC	b1923	flgD	b1075
fliC	b1923	flgE	b1076
fliC	b1923	flgF	b1077
fliC	b1923	flgG	b1078
fliC	b1923	flgH	b1079
fliC	b1923	flgI	b1080
fliC	b1923	flgJ	b1081
fliC	b1923	flgK	b1082
fliC	b1923	flgL	b1083
fliC	b1923	flgM	b1071
fliC	b1923	flgN	b1070
fliC	b1923	flhA	b1879
fliC	b1923	flhB	b1880
fliC	b1923	flhC	b1891
fliC	b1923	flhD	b1892
fliC	b1923	flhE	b1878
fliC	b1923	fliA	b1922
fliD	b1924	aer	b3072
fliD	b1924	cheA	b1888
fliD	b1924	cheB	b1883
fliD	b1924	cheR	b1884
fliD	b1924	cheW	b1887
fliD	b1924	cheY	b1882
fliD	b1924	cheZ	b1881
fliD	b1924	flgA	b1072
fliD	b1924	flgB	b1073
fliD	b1924	flgC	b1074
fliD	b1924	flgD	b1075
fliD	b1924	flgE	b1076
fliD	b1924	flgF	b1077
fliD	b1924	flgG	b1078
fliD	b1924	flgH	b1079
fliD	b1924	flgI	b1080
fliD	b1924	flgJ	b1081
fliD	b1924	flgK	b1082
fliD	b1924	flgL	b1083
fliD	b1924	flgM	b1071
fliD	b1924	flgN	b1070
fliD	b1924	flhA	b1879
fliD	b1924	flhB	b1880
fliD	b1924	flhC	b1891
fliD	b1924	flhD	b1892
fliD	b1924	flhE	b1878
fliD	b1924	fliA	b1922
fliD	b1924	fliC	b1923
fliE	b1937	aer	b3072
fliE	b1937	cheA	b1888
fliE	b1937	cheB	b1883
fliE	b1937	cheR	b1884
fliE	b1937	cheW	b1887
fliE	b1937	cheY	b1882
fliE	b1937	cheZ	b1881
fliE	b1937	flgA	b1072
fliE	b1937	flgB	b1073
fliE	b1937	flgC	b1074
fliE	b1937	flgD	b1075
fliE	b1937	flgE	b1076
fliE	b1937	flgF	b1077
fliE	b1937	flgG	b1078
fliE	b1937	flgH	b1079
fliE	b1937	flgI	b1080
fliE	b1937	flgJ	b1081
fliE	b1937	flgK	b1082
fliE	b1937	flgL	b1083
fliE	b1937	flgM	b1071
fliE	b1937	flgN	b1070
fliE	b1937	flhA	b1879
fliE	b1937	flhB	b1880
fliE	b1937	flhC	b1891
fliE	b1937	flhD	b1892
fliE	b1937	flhE	b1878
fliE	b1937	fliA	b1922
fliE	b1937	fliC	b1923
fliE	b1937	fliD	b1924
fliF	b1938	aer	b3072
fliF	b1938	cheA	b1888
fliF	b1938	cheB	b1883
fliF	b1938	cheR	b1884
fliF	b1938	cheW	b1887
fliF	b1938	cheY	b1882
fliF	b1938	cheZ	b1881
fliF	b1938	flgA	b1072
fliF	b1938	flgB	b1073
fliF	b1938	flgC	b1074
fliF	b1938	flgD	b1075
fliF	b1938	flgE	b1076
fliF	b1938	flgF	b1077
fliF	b1938	flgG	b1078
fliF	b1938	flgH	b1079
fliF	b1938	flgI	b1080
fliF	b1938	flgJ	b1081
fliF	b1938	flgK	b1082
fliF	b1938	flgL	b1083
fliF	b1938	flgM	b1071
fliF	b1938	flgN	b1070
fliF	b1938	flhA	b1879
fliF	b1938	flhB	b1880
fliF	b1938	flhC	b1891
fliF	b1938	flhD	b1892
fliF	b1938	flhE	b1878
fliF	b1938	fliA	b1922
fliF	b1938	fliC	b1923
fliF	b1938	fliD	b1924
fliF	b1938	fliE	b1937
fliG	b1939	aer	b3072
fliG	b1939	cheA	b1888
fliG	b1939	cheB	b1883
fliG	b1939	cheR	b1884
fliG	b1939	cheW	b1887
fliG	b1939	cheY	b1882
fliG	b1939	cheZ	b1881
fliG	b1939	flgA	b1072
fliG	b1939	flgB	b1073
fliG	b1939	flgC	b1074
fliG	b1939	flgD	b1075
fliG	b1939	flgE	b1076
fliG	b1939	flgF	b1077
fliG	b1939	flgG	b1078
fliG	b1939	flgH	b1079
fliG	b1939	flgI	b1080
fliG	b1939	flgJ	b1081
fliG	b1939	flgK	b1082
fliG	b1939	flgL	b1083
fliG	b1939	flgM	b1071
fliG	b1939	flgN	b1070
fliG	b1939	flhA	b1879
fliG	b1939	flhB	b1880
fliG	b1939	flhC	b1891
fliG	b1939	flhD	b1892
fliG	b1939	flhE	b1878
fliG	b1939	fliA	b1922
fliG	b1939	fliC	b1923
fliG	b1939	fliD	b1924
fliG	b1939	fliE	b1937
fliG	b1939	fliF	b1938
fliH	b1940	aer	b3072
fliH	b1940	cheA	b1888
fliH	b1940	cheB	b1883
fliH	b1940	cheR	b1884
fliH	b1940	cheW	b1887
fliH	b1940	cheY	b1882
fliH	b1940	cheZ	b1881
fliH	b1940	flgA	b1072
fliH	b1940	flgB	b1073
fliH	b1940	flgC	b1074
fliH	b1940	flgD	b1075
fliH	b1940	flgE	b1076
fliH	b1940	flgF	b1077
fliH	b1940	flgG	b1078
fliH	b1940	flgH	b1079
fliH	b1940	flgI	b1080
fliH	b1940	flgJ	b1081
fliH	b1940	flgK	b1082
fliH	b1940	flgL	b1083
fliH	b1940	flgM	b1071
fliH	b1940	flgN	b1070
fliH	b1940	flhA	b1879
fliH	b1940	flhB	b1880
fliH	b1940	flhC	b1891
fliH	b1940	flhD	b1892
fliH	b1940	flhE	b1878
fliH	b1940	fliA	b1922
fliH	b1940	fliC	b1923
fliH	b1940	fliD	b1924
fliH	b1940	fliE	b1937
fliH	b1940	fliF	b1938
fliH	b1940	fliG	b1939
fliI	b1941	aer	b3072
fliI	b1941	cheA	b1888
fliI	b1941	cheB	b1883
fliI	b1941	cheR	b1884
fliI	b1941	cheW	b1887
fliI	b1941	cheY	b1882
fliI	b1941	cheZ	b1881
fliI	b1941	flgA	b1072
fliI	b1941	flgB	b1073
fliI	b1941	flgC	b1074
fliI	b1941	flgD	b1075
fliI	b1941	flgE	b1076
fliI	b1941	flgF	b1077
fliI	b1941	flgG	b1078
fliI	b1941	flgH	b1079
fliI	b1941	flgI	b1080
fliI	b1941	flgJ	b1081
fliI	b1941	flgK	b1082
fliI	b1941	flgL	b1083
fliI	b1941	flgM	b1071
fliI	b1941	flgN	b1070
fliI	b1941	flhA	b1879
fliI	b1941	flhB	b1880
fliI	b1941	flhC	b1891
fliI	b1941	flhD	b1892
fliI	b1941	flhE	b1878
fliI	b1941	fliA	b1922
fliI	b1941	fliC	b1923
fliI	b1941	fliD	b1924
fliI	b1941	fliE	b1937
fliI	b1941	fliF	b1938
fliI	b1941	fliG	b1939
fliI	b1941	fliH	b1940
fliJ	b1942	aer	b3072
fliJ	b1942	cheA	b1888
fliJ	b1942	cheB	b1883
fliJ	b1942	cheR	b1884
fliJ	b1942	cheW	b1887
fliJ	b1942	cheY	b1882
fliJ	b1942	cheZ	b1881
fliJ	b1942	flgA	b1072
fliJ	b1942	flgB	b1073
fliJ	b1942	flgC	b1074
fliJ	b1942	flgD	b1075
fliJ	b1942	flgE	b1076
fliJ	b1942	flgF	b1077
fliJ	b1942	flgG	b1078
fliJ	b1942	flgH	b1079
fliJ	b1942	flgI	b1080
fliJ	b1942	flgJ	b1081
fliJ	b1942	flgK	b1082
fliJ	b1942	flgL	b1083
fliJ	b1942	flgM	b1071
fliJ	b1942	flgN	b1070
fliJ	b1942	flhA	b1879
fliJ	b1942	flhB	b1880
fliJ	b1942	flhC	b1891
fliJ	b1942	flhD	b1892
fliJ	b1942	flhE	b1878
fliJ	b1942	fliA	b1922
fliJ	b1942	fliC	b1923
fliJ	b1942	fliD	b1924
fliJ	b1942	fliE	b1937
fliJ	b1942	fliF	b1938
fliJ	b1942	fliG	b1939
fliJ	b1942	fliH	b1940
fliJ	b1942	fliI	b1941
fliK	b1943	aer	b3072
fliK	b1943	cheA	b1888
fliK	b1943	cheB	b1883
fliK	b1943	cheR	b1884
fliK	b1943	cheW	b1887
fliK	b1943	cheY	b1882
fliK	b1943	cheZ	b1881
fliK	b1943	flgA	b1072
fliK	b1943	flgB	b1073
fliK	b1943	flgC	b1074
fliK	b1943	flgD	b1075
fliK	b1943	flgE	b1076
fliK	b1943	flgF	b1077
fliK	b1943	flgG	b1078
fliK	b1943	flgH	b1079
fliK	b1943	flgI	b1080
fliK	b1943	flgJ	b1081
fliK	b1943	flgK	b1082
fliK	b1943	flgL	b1083
fliK	b1943	flgM	b1071
fliK	b1943	flgN	b1070
fliK	b1943	flhA	b1879
fliK	b1943	flhB	b1880
fliK	b1943	flhC	b1891
fliK	b1943	flhD	b1892
fliK	b1943	flhE	b1878
fliK	b1943	fliA	b1922
fliK	b1943	fliC	b1923
fliK	b1943	fliD	b1924
fliK	b1943	fliE	b1937
fliK	b1943	fliF	b1938
fliK	b1943	fliG	b1939
fliK	b1943	fliH	b1940
fliK	b1943	fliI	b1941
fliK	b1943	fliJ	b1942
fliL	b1944	aer	b3072
fliL	b1944	cheA	b1888
fliL	b1944	cheB	b1883
fliL	b1944	cheR	b1884
fliL	b1944	cheW	b1887
fliL	b1944	cheY	b1882
fliL	b1944	cheZ	b1881
fliL	b1944	flgA	b1072
fliL	b1944	flgB	b1073
fliL	b1944	flgC	b1074
fliL	b1944	flgD	b1075
fliL	b1944	flgE	b1076
fliL	b1944	flgF	b1077
fliL	b1944	flgG	b1078
fliL	b1944	flgH	b1079
fliL	b1944	flgI	b1080
fliL	b1944	flgJ	b1081
fliL	b1944	flgK	b1082
fliL	b1944	flgL	b1083
fliL	b1944	flgM	b1071
fliL	b1944	flgN	b1070
fliL	b1944	flhA	b1879
fliL	b1944	flhB	b1880
fliL	b1944	flhC	b1891
fliL	b1944	flhD	b1892
fliL	b1944	flhE	b1878
fliL	b1944	fliA	b1922
fliL	b1944	fliC	b1923
fliL	b1944	fliD	b1924
fliL	b1944	fliE	b1937
fliL	b1944	fliF	b1938
fliL	b1944	fliG	b1939
fliL	b1944	fliH	b1940
fliL	b1944	fliI	b1941
fliL	b1944	fliJ	b1942
fliL	b1944	fliK	b1943
fliM	b1945	aer	b3072
fliM	b1945	cheA	b1888
fliM	b1945	cheB	b1883
fliM	b1945	cheR	b1884
fliM	b1945	cheW	b1887
fliM	b1945	cheY	b1882
fliM	b1945	cheZ	b1881
fliM	b1945	flgA	b1072
fliM	b1945	flgB	b1073
fliM	b1945	flgC	b1074
fliM	b1945	flgD	b1075
fliM	b1945	flgE	b1076
fliM	b1945	flgF	b1077
fliM	b1945	flgG	b1078
fliM	b1945	flgH	b1079
fliM	b1945	flgI	b1080
fliM	b1945	flgJ	b1081
fliM	b1945	flgK	b1082
fliM	b1945	flgL	b1083
fliM	b1945	flgM	b1071
fliM	b1945	flgN	b1070
fliM	b1945	flhA	b1879
fliM	b1945	flhB	b1880
fliM	b1945	flhC	b1891
fliM	b1945	flhD	b1892
fliM	b1945	flhE	b1878
fliM	b1945	fliA	b1922
fliM	b1945	fliC	b1923
fliM	b1945	fliD	b1924
fliM	b1945	fliE	b1937
fliM	b1945	fliF	b1938
fliM	b1945	fliG	b1939
fliM	b1945	fliH	b1940
fliM	b1945	fliI	b1941
fliM	b1945	fliJ	b1942
fliM	b1945	fliK	b1943
fliM	b1945	fliL	b1944
fliN	b1946	aer	b3072
fliN	b1946	cheA	b1888
fliN	b1946	cheB	b1883
fliN	b1946	cheR	b1884
fliN	b1946	cheW	b1887
fliN	b1946	cheY	b1882
fliN	b1946	cheZ	b1881
fliN	b1946	flgA	b1072
fliN	b1946	flgB	b1073
fliN	b1946	flgC	b1074
fliN	b1946	flgD	b1075
fliN	b1946	flgE	b1076
fliN	b1946	flgF	b1077
fliN	b1946	flgG	b1078
fliN	b1946	flgH	b1079
fliN	b1946	flgI	b1080
fliN	b1946	flgJ	b1081
fliN	b1946	flgK	b1082
fliN	b1946	flgL	b1083
fliN	b1946	flgM	b1071
fliN	b1946	flgN	b1070
fliN	b1946	flhA	b1879
fliN	b1946	flhB	b1880
fliN	b1946	flhC	b1891
fliN	b1946	flhD	b1892
fliN	b1946	flhE	b1878
fliN	b1946	fliA	b1922
fliN	b1946	fliC	b1923
fliN	b1946	fliD	b1924
fliN	b1946	fliE	b1937
fliN	b1946	fliF	b1938
fliN	b1946	fliG	b1939
fliN	b1946	fliH	b1940
fliN	b1946	fliI	b1941
fliN	b1946	fliJ	b1942
fliN	b1946	fliK	b1943
fliN	b1946	fliL	b1944
fliN	b1946	fliM	b1945
fliO	b1947	aer	b3072
fliO	b1947	cheA	b1888
fliO	b1947	cheB	b1883
fliO	b1947	cheR	b1884
fliO	b1947	cheW	b1887
fliO	b1947	cheY	b1882
fliO	b1947	cheZ	b1881
fliO	b1947	flgA	b1072
fliO	b1947	flgB	b1073
fliO	b1947	flgC	b1074
fliO	b1947	flgD	b1075
fliO	b1947	flgE	b1076
fliO	b1947	flgF	b1077
fliO	b1947	flgG	b1078
fliO	b1947	flgH	b1079
fliO	b1947	flgI	b1080
fliO	b1947	flgJ	b1081
fliO	b1947	flgK	b1082
fliO	b1947	flgL	b1083
fliO	b1947	flgM	b1071
fliO	b1947	flgN	b1070
fliO	b1947	flhA	b1879
fliO	b1947	flhB	b1880
fliO	b1947	flhC	b1891
fliO	b1947	flhD	b1892
fliO	b1947	flhE	b1878
fliO	b1947	fliA	b1922
fliO	b1947	fliC	b1923
fliO	b1947	fliD	b1924
fliO	b1947	fliE	b1937
fliO	b1947	fliF	b1938
fliO	b1947	fliG	b1939
fliO	b1947	fliH	b1940
fliO	b1947	fliI	b1941
fliO	b1947	fliJ	b1942
fliO	b1947	fliK	b1943
fliO	b1947	fliL	b1944
fliO	b1947	fliM	b1945
fliO	b1947	fliN	b1946
fliP	b1948	aer	b3072
fliP	b1948	cheA	b1888
fliP	b1948	cheB	b1883
fliP	b1948	cheR	b1884
fliP	b1948	cheW	b1887
fliP	b1948	cheY	b1882
fliP	b1948	cheZ	b1881
fliP	b1948	flgA	b1072
fliP	b1948	flgB	b1073
fliP	b1948	flgC	b1074
fliP	b1948	flgD	b1075
fliP	b1948	flgE	b1076
fliP	b1948	flgF	b1077
fliP	b1948	flgG	b1078
fliP	b1948	flgH	b1079
fliP	b1948	flgI	b1080
fliP	b1948	flgJ	b1081
fliP	b1948	flgK	b1082
fliP	b1948	flgL	b1083
fliP	b1948	flgM	b1071
fliP	b1948	flgN	b1070
fliP	b1948	flhA	b1879
fliP	b1948	flhB	b1880
fliP	b1948	flhC	b1891
fliP	b1948	flhD	b1892
fliP	b1948	flhE	b1878
fliP	b1948	fliA	b1922
fliP	b1948	fliC	b1923
fliP	b1948	fliD	b1924
fliP	b1948	fliE	b1937
fliP	b1948	fliF	b1938
fliP	b1948	fliG	b1939
fliP	b1948	fliH	b1940
fliP	b1948	fliI	b1941
fliP	b1948	fliJ	b1942
fliP	b1948	fliK	b1943
fliP	b1948	fliL	b1944
fliP	b1948	fliM	b1945
fliP	b1948	fliN	b1946
fliP	b1948	fliO	b1947
fliQ	b1949	aer	b3072
fliQ	b1949	cheA	b1888
fliQ	b1949	cheB	b1883
fliQ	b1949	cheR	b1884
fliQ	b1949	cheW	b1887
fliQ	b1949	cheY	b1882
fliQ	b1949	cheZ	b1881
fliQ	b1949	flgA	b1072
fliQ	b1949	flgB	b1073
fliQ	b1949	flgC	b1074
fliQ	b1949	flgD	b1075
fliQ	b1949	flgE	b1076
fliQ	b1949	flgF	b1077
fliQ	b1949	flgG	b1078
fliQ	b1949	flgH	b1079
fliQ	b1949	flgI	b1080
fliQ	b1949	flgJ	b1081
fliQ	b1949	flgK	b1082
fliQ	b1949	flgL	b1083
fliQ	b1949	flgM	b1071
fliQ	b1949	flgN	b1070
fliQ	b1949	flhA	b1879
fliQ	b1949	flhB	b1880
fliQ	b1949	flhC	b1891
fliQ	b1949	flhD	b1892
fliQ	b1949	flhE	b1878
fliQ	b1949	fliA	b1922
fliQ	b1949	fliC	b1923
fliQ	b1949	fliD	b1924
fliQ	b1949	fliE	b1937
fliQ	b1949	fliF	b1938
fliQ	b1949	fliG	b1939
fliQ	b1949	fliH	b1940
fliQ	b1949	fliI	b1941
fliQ	b1949	fliJ	b1942
fliQ	b1949	fliK	b1943
fliQ	b1949	fliL	b1944
fliQ	b1949	fliM	b1945
fliQ	b1949	fliN	b1946
fliQ	b1949	fliO	b1947
fliQ	b1949	fliP	b1948
fliR	b1950	aer	b3072
fliR	b1950	cheB	b1883
fliR	b1950	cheR	b1884
fliR	b1950	cheZ	b1881
fliR	b1950	flgA	b1072
fliR	b1950	flgB	b1073
fliR	b1950	flgC	b1074
fliR	b1950	flgD	b1075
fliR	b1950	flgE	b1076
fliR	b1950	flgF	b1077
fliR	b1950	flgG	b1078
fliR	b1950	flgH	b1079
fliR	b1950	flgI	b1080
fliR	b1950	flgJ	b1081
fliR	b1950	flgL	b1083
fliR	b1950	flhA	b1879
fliR	b1950	flhB	b1880
fliR	b1950	flhC	b1891
fliR	b1950	flhE	b1878
fliR	b1950	fliA	b1922
fliR	b1950	fliD	b1924
fliR	b1950	fliE	b1937
fliR	b1950	fliF	b1938
fliR	b1950	fliG	b1939
fliR	b1950	fliH	b1940
fliR	b1950	fliI	b1941
fliR	b1950	fliJ	b1942
fliR	b1950	fliK	b1943
fliR	b1950	fliL	b1944
fliR	b1950	fliM	b1945
fliR	b1950	fliN	b1946
fliR	b1950	fliO	b1947
fliR	b1950	fliP	b1948
fliR	b1950	fliQ	b1949
fliS	b1925	aer	b3072
fliS	b1925	cheA	b1888
fliS	b1925	cheB	b1883
fliS	b1925	cheR	b1884
fliS	b1925	cheW	b1887
fliS	b1925	cheY	b1882
fliS	b1925	cheZ	b1881
fliS	b1925	flgA	b1072
fliS	b1925	flgB	b1073
fliS	b1925	flgC	b1074
fliS	b1925	flgD	b1075
fliS	b1925	flgE	b1076
fliS	b1925	flgF	b1077
fliS	b1925	flgG	b1078
fliS	b1925	flgH	b1079
fliS	b1925	flgI	b1080
fliS	b1925	flgJ	b1081
fliS	b1925	flgK	b1082
fliS	b1925	flgL	b1083
fliS	b1925	flgM	b1071
fliS	b1925	flgN	b1070
fliS	b1925	flhA	b1879
fliS	b1925	flhB	b1880
fliS	b1925	flhC	b1891
fliS	b1925	flhD	b1892
fliS	b1925	flhE	b1878
fliS	b1925	fliA	b1922
fliS	b1925	fliC	b1923
fliS	b1925	fliD	b1924
fliS	b1925	fliE	b1937
fliS	b1925	fliF	b1938
fliS	b1925	fliG	b1939
fliS	b1925	fliH	b1940
fliS	b1925	fliI	b1941
fliS	b1925	fliJ	b1942
fliS	b1925	fliK	b1943
fliS	b1925	fliL	b1944
fliS	b1925	fliM	b1945
fliS	b1925	fliN	b1946
fliS	b1925	fliO	b1947
fliS	b1925	fliP	b1948
fliS	b1925	fliQ	b1949
fliS	b1925	fliR	b1950
fliT	b1926	aer	b3072
fliT	b1926	cheA	b1888
fliT	b1926	cheB	b1883
fliT	b1926	cheR	b1884
fliT	b1926	cheW	b1887
fliT	b1926	cheY	b1882
fliT	b1926	cheZ	b1881
fliT	b1926	flgA	b1072
fliT	b1926	flgB	b1073
fliT	b1926	flgC	b1074
fliT	b1926	flgD	b1075
fliT	b1926	flgE	b1076
fliT	b1926	flgF	b1077
fliT	b1926	flgG	b1078
fliT	b1926	flgH	b1079
fliT	b1926	flgI	b1080
fliT	b1926	flgJ	b1081
fliT	b1926	flgK	b1082
fliT	b1926	flgL	b1083
fliT	b1926	flgM	b1071
fliT	b1926	flgN	b1070
fliT	b1926	flhA	b1879
fliT	b1926	flhB	b1880
fliT	b1926	flhC	b1891
fliT	b1926	flhD	b1892
fliT	b1926	flhE	b1878
fliT	b1926	fliA	b1922
fliT	b1926	fliC	b1923
fliT	b1926	fliD	b1924
fliT	b1926	fliE	b1937
fliT	b1926	fliF	b1938
fliT	b1926	fliG	b1939
fliT	b1926	fliH	b1940
fliT	b1926	fliI	b1941
fliT	b1926	fliJ	b1942
fliT	b1926	fliK	b1943
fliT	b1926	fliL	b1944
fliT	b1926	fliM	b1945
fliT	b1926	fliN	b1946
fliT	b1926	fliO	b1947
fliT	b1926	fliP	b1948
fliT	b1926	fliQ	b1949
fliT	b1926	fliR	b1950
fliT	b1926	fliS	b1925
fliY	b1920	aroG	b754
fliY	b1920	cysA	b2422
fliY	b1920	cysC	b2750
fliY	b1920	cysD	b2752
[truncated: 16,221 more rows]
