# Supplementary material for: Robust Detection of Hierarchical Communities from Escherichia coli Gene Expression Data
Source: PLoS Comput Biol. 2012 Feb 23;8(2):e1002391. doi: 10.1371/journal.pcbi.1002391 (PMC3285575; doi:10.1371/journal.pcbi.1002391)
Supplement: Dataset S9 — List of GO term enrichments at each noise value. To determine the effect of noise on GO term enrichment, at each noise value , a test to determine whether the identified communities significantly enrich for any of the gene ontology (GO) terms identified in E. coli is performed. At each value, each significant enrichment is listed by giving it's corresponding p-value, GO term number, core community number, community size, GO term size, the number of genes in common, and the biological description of the GO term. (XLS) [file pcbi.1002391.s009.xls]

## Sheet: c=0
PVALUE	GOTERMNUMBER	COMNUMBER	COMSIZE	GOSIZE	#INCOMMON	DESCRIPTION
3.80387e-23	6412	1	1191	101	79	translation
6.12736e-22	3735	1	1191	56	52	structural constituent of ribosome
9.57465e-21	3723	1	1191	105	78	RNA binding
9.11827e-18	19843	1	1191	42	40	rRNA binding
2.86255e-16	30529	1	1191	36	35	ribonucleoprotein complex
9.21133e-16	5840	1	1191	38	36	ribosome
4.6246e-12	9288	2	1054	24	24	bacterial-type flagellum
2.72842e-10	5515	1	1191	875	327	protein binding calmodulin binding
4.10756e-09	5737	1	1191	674	259	cytoplasm
1.57011e-08	1539	2	1054	28	24	ciliary or flagellar motility
2.39525e-08	3774	2	1054	17	17	motor activity
3.19366e-08	9425	2	1054	17	17	bacterial-type flagellum basal body
1.44092e-06	6865	3	814	70	36	amino acid transport
3.17212e-06	22627	1	1191	17	16	cytosolic small ribosomal subunit
3.93735e-06	49	1	1191	24	20	tRNA binding
5.81303e-06	8652	3	814	62	32	cellular amino acid biosynthetic process
1.08817e-05	19861	2	1054	15	14	flagellum
1.09552e-05	30170	3	814	55	29	pyridoxal phosphate binding
1.4628e-05	6457	1	1191	27	21	protein folding 'de novo' protein folding
1.98888e-05	5829	1	1191	121	60	cytosol
6.14243e-05	8360	1	1191	37	25	regulation of cell shape
6.29678e-05	6935	2	1054	22	17	chemotaxis
0.000115135	42597	3	814	161	57	periplasmic space
0.000196135	9252	1	1191	41	26	peptidoglycan biosynthetic process
0.00021457	9408	1	1191	26	19	response to heat
0.000229808	6526	3	814	13	11	arginine biosynthetic process
0.000441753	6633	1	1191	17	14	fatty acid biosynthetic process hexadecanal biosynthetic process
0.000520884	7049	1	1191	55	31	cell cycle
0.000523875	5198	2	1054	20	15	structural molecule activity
0.000832365	287	1	1191	166	71	magnesium ion binding
0.00112287	9103	1	1191	67	35	lipopolysaccharide biosynthetic process
0.00200231	15986	1	1191	11	10	ATP synthesis coupled proton transport
0.00288156	51301	1	1191	49	27	cell division
0.00296261	46933	1	1191	8	8	hydrogen ion transporting ATP synthase activity, rotational mechanism
0.0029993	55085	2	1054	150	59	transmembrane transport
0.00344862	105	3	814	11	9	histidine biosynthetic process
0.00548645	30145	1	1191	69	34	manganese ion binding
0.00687588	51082	1	1191	18	13	unfolded protein binding
0.00697226	4519	1	1191	29	18	endonuclease activity
0.00708424	6744	1	1191	18	13	ubiquinone biosynthetic process FADH2 metabolic process
0.00819207	15934	1	1191	7	7	large ribosomal subunit
0.00841348	65002	1	1191	7	7	intracellular protein transmembrane transport
0.00864719	46961	1	1191	7	7	proton-transporting ATPase activity, rotational mechanism
0.00879879	16021	4	785	866	203	integral to membrane
0.00968607	5506	3	814	210	62	iron ion binding
0.0103838	162	3	814	6	6	tryptophan biosynthetic process protein phosphatase type 1 complex
0.0114222	9098	3	814	6	6	leucine biosynthetic process
0.0115624	15716	5	453	12	8	phosphonate transport
0.0121739	5886	4	785	1037	233	plasma membrane integral to plasma membrane
0.0125084	16757	1	1191	28	17	transferase activity, transferring glycosyl groups
0.0126914	15421	3	814	6	6	oligopeptide-transporting ATPase activity
0.0153205	16597	3	814	18	11	amino acid binding
0.0169277	15453	1	1191	15	11	oxidoreduction-driven active transmembrane transporter activity light-driven active transmembrane transporter activity
0.0200323	16829	3	814	81	29	lyase activity
0.0205302	6164	3	814	16	10	purine nucleotide biosynthetic process
0.0213555	6099	3	814	25	13	tricarboxylic acid cycle
0.0215366	16491	3	814	264	72	oxidoreductase activity
0.0245053	6353	1	1191	6	6	transcription termination
0.0246837	45454	1	1191	20	13	cell redox homeostasis
0.0256155	6541	3	814	14	9	glutamine metabolic process
0.0263472	6113	3	814	5	5	fermentation
0.0275448	15768	3	814	5	5	maltose transport
0.0277377	5525	1	1191	40	21	GTP binding
0.0291305	16779	1	1191	35	19	nucleotidyltransferase activity phosphotransferase activity, for other substituted phosphate groups
0.031393	3924	1	1191	16	11	GTPase activity small monomeric GTPase activity ARF small monomeric GTPase activity
0.0319322	5624	1	1191	65	30	membrane fraction
0.0335107	7047	1	1191	46	23	cellular cell wall organization oncogenesis
0.0362955	16021	2	1054	866	248	integral to membrane
0.0373867	8940	2	1054	12	9	nitrate reductase activity
0.0380998	55114	3	814	363	92	oxidation reduction
0.0420333	5886	2	1054	1037	291	plasma membrane integral to plasma membrane

## Sheet: c=0.5
PVALUE	GOTERMNUMBER	COMNUMBER	COMSIZE	GOSIZE	#INCOMMON	DESCRIPTION
2.84794e-26	6412	4	1012	101	77	translation
1.31318e-25	3735	4	1012	56	52	structural constituent of ribosome
8.05046e-19	19843	4	1012	42	39	rRNA binding
1.30097e-18	3723	4	1012	105	70	RNA binding
3.19389e-18	5840	4	1012	38	36	ribosome
4.53118e-17	30529	4	1012	36	34	ribonucleoprotein complex
7.19779e-14	9288	1	888	24	24	bacterial-type flagellum
2.98411e-10	1539	1	888	28	24	ciliary or flagellar motility
1.26906e-09	3774	1	888	17	17	motor activity
1.69209e-09	9425	1	888	17	17	bacterial-type flagellum basal body
2.32936e-09	5515	4	1012	875	283	protein binding calmodulin binding
1.66324e-08	6865	2	700	70	36	amino acid transport
1.86669e-07	5737	4	1012	674	221	cytoplasm
2.67647e-07	22627	4	1012	17	16	cytosolic small ribosomal subunit
1.43035e-06	19861	1	888	15	14	flagellum
3.14442e-06	8652	2	700	62	30	cellular amino acid biosynthetic process
7.13783e-06	6935	1	888	22	17	chemotaxis
2.54546e-05	49	4	1012	24	18	tRNA binding
4.38607e-05	30170	2	700	55	26	pyridoxal phosphate binding
5.31107e-05	6457	4	1012	27	19	protein folding 'de novo' protein folding
5.72459e-05	5829	4	1012	121	53	cytosol
6.05746e-05	5198	1	888	20	15	structural molecule activity
6.91545e-05	6526	2	700	13	11	arginine biosynthetic process
7.48797e-05	42597	2	700	161	52	periplasmic space
0.00059612	15986	4	1012	11	10	ATP synthesis coupled proton transport
0.00065247	9252	4	1012	41	23	peptidoglycan biosynthetic process
0.00073747	7049	4	1012	55	28	cell cycle
0.00105678	46933	4	1012	8	8	hydrogen ion transporting ATP synthase activity, rotational mechanism
0.00107331	105	2	700	11	9	histidine biosynthetic process
0.00113413	8360	4	1012	37	21	regulation of cell shape
0.00342328	287	4	1012	166	61	magnesium ion binding
0.00354439	15934	4	1012	7	7	large ribosomal subunit
0.00367566	65002	4	1012	7	7	intracellular protein transmembrane transport
0.00381703	46961	4	1012	7	7	proton-transporting ATPase activity, rotational mechanism
0.00426776	16597	2	700	18	11	amino acid binding
0.00460556	162	2	700	6	6	tryptophan biosynthetic process protein phosphatase type 1 complex
0.00511729	9098	2	700	6	6	leucine biosynthetic process
0.00513624	51301	4	1012	49	24	cell division
0.0051857	9103	4	1012	67	30	lipopolysaccharide biosynthetic process
0.00727957	6164	2	700	16	10	purine nucleotide biosynthetic process
0.00843882	51082	4	1012	18	12	unfolded protein binding
0.00879431	19439	9	11	13	3	aromatic compound catabolic process
0.011526	6541	2	700	14	9	glutamine metabolic process
0.0131838	8940	1	888	12	9	nitrate reductase activity
0.0132285	6353	4	1012	6	6	transcription termination
0.0136959	9055	1	888	116	41	electron carrier activity
0.0168896	16779	4	1012	35	18	nucleotidyltransferase activity phosphotransferase activity, for other substituted phosphate groups
0.0177762	6113	2	700	5	5	fermentation
0.0189612	15768	2	700	5	5	maltose transport
0.0205469	30145	4	1012	69	29	manganese ion binding
0.0263048	43190	2	700	36	15	ATP-binding cassette (ABC) transporter complex
0.026948	5506	2	700	210	53	iron ion binding
0.0269795	16829	2	700	81	26	lyase activity
0.0272763	15453	4	1012	15	10	oxidoreduction-driven active transmembrane transporter activity light-driven active transmembrane transporter activity
0.0274298	45454	4	1012	20	12	cell redox homeostasis
0.0285464	5737	2	700	674	139	cytoplasm
0.0308872	16491	2	700	264	63	oxidoreductase activity
0.0311482	55114	2	700	363	82	oxidation reduction
0.0344162	5624	4	1012	65	27	membrane fraction
0.0358303	6744	4	1012	18	11	ubiquinone biosynthetic process FADH2 metabolic process
0.0358697	9408	4	1012	26	14	response to heat
0.0363248	5886	1	888	1037	250	plasma membrane integral to plasma membrane
0.0374564	9325	1	888	11	8	nitrate reductase complex
0.0377549	42936	2	700	8	6	dipeptide transporter activity
0.0383877	6886	4	1012	5	5	intracellular protein transport exocytosis
0.0392222	15450	4	1012	5	5	P-P-bond-hydrolysis-driven protein transmembrane transporter activity
0.0396597	9296	1	888	11	8	flagellum assembly
0.0400938	43952	4	1012	5	5	protein transport by the Sec complex
0.041005	43022	4	1012	5	5	ribosome binding
0.0419586	45261	4	1012	5	5	proton-transporting ATP synthase complex, catalytic core F(1)
0.042368	42128	1	888	19	11	nitrate assimilation
0.0449826	5978	2	700	4	4	glycogen biosynthetic process
0.0461347	6189	2	700	6	5	'de novo' IMP biosynthetic process
0.0461664	9088	2	700	4	4	threonine biosynthetic process
0.0465334	6979	2	700	14	8	response to oxidative stress
0.0472599	16114	4	1012	7	6	terpenoid biosynthetic process
0.0474141	15594	2	700	4	4	putrescine-importing ATPase activity
0.0476725	103	2	700	6	5	sulfate assimilation
0.0480525	6099	2	700	25	11	tricarboxylic acid cycle
0.0487312	15423	2	700	4	4	maltose-transporting ATPase activity
0.0493164	15421	2	700	6	5	oligopeptide-transporting ATPase activity

## Sheet: c=1
PVALUE	GOTERMNUMBER	COMNUMBER	COMSIZE	GOSIZE	#INCOMMON	DESCRIPTION
6.40798e-26	3735	1	985	56	52	structural constituent of ribosome
2.34362e-24	6412	1	985	101	74	translation
2.0086e-18	5840	1	985	38	36	ribosome
7.19328e-18	19843	1	985	42	38	rRNA binding
2.16994e-17	30529	1	985	36	34	ribonucleoprotein complex
3.69467e-15	9288	2	786	24	24	bacterial-type flagellum
9.73952e-15	3723	1	985	105	64	RNA binding
1.72357e-11	1539	2	786	28	24	ciliary or flagellar motility
1.56279e-10	3774	2	786	17	17	motor activity
2.08371e-10	9425	2	786	17	17	bacterial-type flagellum basal body
3.86044e-09	19861	2	786	15	15	flagellum
1.81519e-08	16151	7	50	27	9	nickel ion binding
2.78311e-08	6865	3	595	70	33	amino acid transport
6.20477e-08	6935	2	786	22	18	chemotaxis
2.18119e-07	22627	1	985	17	16	cytosolic small ribosomal subunit
3.18428e-07	8652	3	595	62	29	cellular amino acid biosynthetic process
3.67527e-07	5515	1	985	875	267	protein binding calmodulin binding
1.11949e-06	46872	7	50	408	21	metal ion binding
2.92157e-06	5506	7	50	210	15	iron ion binding
3.29671e-06	22900	7	50	94	11	electron transport chain
3.35601e-06	9055	7	50	116	12	electron carrier activity
3.4361e-06	51539	7	50	98	11	4 iron, 4 sulfur cluster binding
5.93366e-06	51536	7	50	106	11	iron-sulfur cluster binding
6.13436e-06	16491	7	50	264	16	oxidoreductase activity
7.60667e-06	30170	3	595	55	25	pyridoxal phosphate binding
1.20875e-05	6526	3	595	13	11	arginine biosynthetic process
1.58362e-05	5198	2	786	20	15	structural molecule activity
1.78046e-05	5737	1	985	674	207	cytoplasm
2.23872e-05	6113	7	50	5	4	fermentation
3.37655e-05	6457	1	985	27	19	protein folding 'de novo' protein folding
0.000346078	5829	1	985	121	50	cytosol
0.000365295	105	3	595	11	9	histidine biosynthetic process
0.00045805	15986	1	985	11	10	ATP synthesis coupled proton transport
0.000472285	7049	1	985	55	28	cell cycle
0.000935605	46933	1	985	8	8	hydrogen ion transporting ATP synthase activity, rotational mechanism
0.00132024	51301	1	985	49	25	cell division
0.00137783	16829	3	595	81	27	lyase activity
0.00154657	42597	3	595	161	43	periplasmic space
0.00157945	16597	3	595	18	11	amino acid binding
0.00173039	162	3	595	6	6	tryptophan biosynthetic process protein phosphatase type 1 complex
0.00174767	55114	7	50	363	15	oxidation reduction
0.00183711	6164	3	595	16	10	purine nucleotide biosynthetic process
0.00192266	9098	3	595	6	6	leucine biosynthetic process
0.00304002	15934	1	985	7	7	large ribosomal subunit
0.00307446	8360	1	985	37	20	regulation of cell shape
0.00315368	49	1	985	24	15	tRNA binding
0.00315695	65002	1	985	7	7	intracellular protein transmembrane transport
0.00328323	46961	1	985	7	7	proton-transporting ATPase activity, rotational mechanism
0.0033095	8901	7	50	5	3	ferredoxin hydrogenase activity hydroxymethylpyrimidine kinase activity
0.00356397	6541	3	595	14	9	glutamine metabolic process
0.00527143	43190	3	595	36	15	ATP-binding cassette (ABC) transporter complex
0.00576082	5829	3	595	121	33	cytosol
0.00600097	104	7	50	6	3	succinate dehydrogenase activity
0.00614451	3824	3	595	371	77	catalytic activity
0.00708137	51082	1	985	18	12	unfolded protein binding
0.00740463	15768	3	595	5	5	maltose transport
0.00863634	9103	1	985	67	29	lipopolysaccharide biosynthetic process
0.00882554	287	1	985	166	58	magnesium ion binding
0.00890738	9408	1	985	26	15	response to heat
0.00932628	7047	1	985	46	22	cellular cell wall organization oncogenesis
0.0109019	6353	1	985	6	6	transcription termination
0.0119502	9055	2	786	116	38	electron carrier activity
0.0125904	9252	1	985	41	20	peptidoglycan biosynthetic process
0.0127735	8137	7	50	20	4	NADH dehydrogenase (ubiquinone) activity
0.0141644	9061	7	50	40	5	anaerobic respiration
0.0161349	6633	1	985	17	11	fatty acid biosynthetic process hexadecanal biosynthetic process
0.0197416	9296	2	786	11	8	flagellum assembly
0.0200341	42936	3	595	8	6	dipeptide transporter activity
0.0212649	6979	3	595	14	8	response to oxidative stress
0.022146	6826	3	595	37	14	iron ion transport
0.0249482	5737	3	595	674	121	cytoplasm
0.0259243	9102	3	595	9	6	biotin biosynthetic process
0.0260579	6189	3	595	6	5	'de novo' IMP biosynthetic process
0.026665	42938	3	595	9	6	dipeptide transport
0.0268935	5978	3	595	4	4	glycogen biosynthetic process
0.0271437	103	3	595	6	5	sulfate assimilation
0.0277084	9088	3	595	4	4	threonine biosynthetic process
0.0283239	15421	3	595	6	5	oligopeptide-transporting ATPase activity
0.0285743	15594	3	595	4	4	putrescine-importing ATPase activity
0.0291755	5215	3	595	209	46	transporter activity
0.0294932	30145	1	985	69	28	manganese ion binding
0.0294961	15423	3	595	4	4	maltose-transporting ATPase activity
0.0304793	15609	3	595	4	4	maltooligosaccharide-importing ATPase activity
0.0309419	9432	2	786	23	12	SOS response
0.0315303	42956	3	595	4	4	maltodextrin transport
0.0326564	6567	3	595	4	4	threonine catabolic process
0.0374833	9296	7	50	11	3	flagellum assembly
0.0375147	6886	1	985	5	5	intracellular protein transport exocytosis
0.0377022	8940	2	786	12	8	nitrate reductase activity
0.0384297	15450	1	985	5	5	P-P-bond-hydrolysis-driven protein transmembrane transporter activity
0.0393904	43952	1	985	5	5	protein transport by the Sec complex
0.0404004	43022	1	985	5	5	ribosome binding
0.0414636	45261	1	985	5	5	proton-transporting ATP synthase complex, catalytic core F(1)
0.0441768	16114	1	985	7	6	terpenoid biosynthetic process
0.0442658	9228	3	595	13	7	thiamin biosynthetic process
0.0490902	6221	3	595	10	6	pyrimidine nucleotide biosynthetic process
0.0491642	9082	3	595	7	5	branched chain family amino acid biosynthetic process

## Sheet: c=2
PVALUE	GOTERMNUMBER	COMNUMBER	COMSIZE	GOSIZE	#INCOMMON	DESCRIPTION
5.94083e-31	3735	1	790	56	52	structural constituent of ribosome
5.62405e-30	6412	1	790	101	73	translation
6.80754e-22	5840	1	790	38	36	ribosome
1.45509e-20	30529	1	790	36	34	ribonucleoprotein complex
1.39761e-18	19843	1	790	42	36	rRNA binding
3.77494e-18	8652	10	228	62	29	cellular amino acid biosynthetic process
1.148e-17	9288	4	409	24	22	bacterial-type flagellum
1.51806e-17	3723	1	790	105	61	RNA binding
1.39325e-16	1539	4	409	28	23	ciliary or flagellar motility
2.66216e-15	3774	4	409	17	17	motor activity
3.35798e-13	9425	4	409	17	16	bacterial-type flagellum basal body
3.4638e-10	6865	10	228	70	23	amino acid transport
4.37479e-10	6526	10	228	13	11	arginine biosynthetic process
7.28258e-10	6935	4	409	22	16	chemotaxis
1.59862e-09	19861	4	409	15	13	flagellum
7.5053e-09	22627	1	790	17	16	cytosolic small ribosomal subunit
1.97904e-08	5515	1	790	875	228	protein binding calmodulin binding
1.03216e-07	16597	10	228	18	11	amino acid binding
4.29826e-07	6164	10	228	16	10	purine nucleotide biosynthetic process
2.42914e-06	5737	1	790	674	177	cytoplasm
3.29056e-06	105	10	228	11	8	histidine biosynthetic process
3.4531e-06	30170	10	228	55	16	pyridoxal phosphate binding
6.57264e-06	162	10	228	6	6	tryptophan biosynthetic process protein phosphatase type 1 complex
9.89025e-06	5198	4	409	20	12	structural molecule activity
7.35013e-05	5829	1	790	121	45	cytosol
7.92182e-05	15986	1	790	11	10	ATP synthesis coupled proton transport
0.000110138	7049	1	790	55	26	cell cycle
0.000147095	42936	10	228	8	6	dipeptide transporter activity
0.000212077	46933	1	790	8	8	hydrogen ion transporting ATP synthase activity, rotational mechanism
0.000339814	9228	10	228	13	7	thiamin biosynthetic process
0.000341804	6457	1	790	27	16	protein folding 'de novo' protein folding
0.000342363	42938	10	228	9	6	dipeptide transport
0.000383771	6189	10	228	6	5	'de novo' IMP biosynthetic process
0.000402855	6541	10	228	14	7	glutamine metabolic process
0.000411184	103	10	228	6	5	sulfate assimilation
0.000442813	9098	10	228	6	5	leucine biosynthetic process
0.000479714	15421	10	228	6	5	oligopeptide-transporting ATPase activity
0.00052515	6221	10	228	10	6	pyrimidine nucleotide biosynthetic process
0.000917332	15934	1	790	7	7	large ribosomal subunit
0.000923588	9088	10	228	4	4	threonine biosynthetic process
0.000955046	9082	10	228	7	5	branched chain family amino acid biosynthetic process
0.000968295	46961	1	790	7	7	proton-transporting ATPase activity, rotational mechanism
0.000973804	51082	1	790	18	12	unfolded protein binding
0.00100174	5215	10	228	209	27	transporter activity
0.00100531	9097	10	228	7	5	isoleucine biosynthetic process leucine biosynthetic process
0.00138623	49	1	790	24	14	tRNA binding
0.00142034	16829	10	228	81	15	lyase activity
0.00143605	51301	1	790	49	22	cell division
0.00147096	6810	10	228	623	56	transport
0.00150866	7047	1	790	46	21	cellular cell wall organization oncogenesis
0.00158115	16491	5	179	264	29	oxidoreductase activity
0.00167984	5737	10	228	674	59	cytoplasm
0.00205159	8360	1	790	37	18	regulation of cell shape
0.00274374	6633	1	790	17	11	fatty acid biosynthetic process hexadecanal biosynthetic process
0.00353312	6353	1	790	6	6	transcription termination
0.00411997	9089	10	228	9	5	lysine biosynthetic process via diaminopimelate homoserine biosynthetic process homoserine catabolic process
0.00471573	9296	4	409	11	7	flagellum assembly
0.00556852	55114	5	179	363	33	oxidation reduction
0.00599398	46872	5	179	408	36	metal ion binding
0.00615411	19569	2	74	3	3	L-arabinose catabolic process to xylulose 5-phosphate
0.00629229	43190	10	228	36	9	ATP-binding cassette (ABC) transporter complex
0.00633046	5506	5	179	210	23	iron ion binding
0.00743281	5524	10	228	422	40	ATP binding
0.00933423	9099	10	228	6	4	valine biosynthetic process
0.0119403	31556	10	228	3	3	transcriptional attenuation by ribosome
0.0123082	19568	2	74	3	3	arabinose catabolic process
0.0123383	16036	10	228	3	3	cellular response to phosphate starvation
0.0127638	19856	10	228	3	3	pyrimidine base biosynthetic process
0.014902	6886	1	790	5	5	intracellular protein transport exocytosis
0.0151599	65002	1	790	7	6	intracellular protein transmembrane transport
0.0153403	15450	1	790	5	5	P-P-bond-hydrolysis-driven protein transmembrane transporter activity
0.0155988	5624	1	790	65	24	membrane fraction
0.0158052	43952	1	790	5	5	protein transport by the Sec complex
0.0162991	45261	1	790	5	5	proton-transporting ATP synthase complex, catalytic core F(1)
0.0167821	51539	5	179	98	14	4 iron, 4 sulfur cluster binding
0.0180626	9239	10	228	7	4	enterobactin biosynthetic process
0.018105	3824	10	228	371	35	catalytic activity
0.018974	166	10	228	432	39	nucleotide binding
0.0231146	9252	1	790	41	17	peptidoglycan biosynthetic process
0.0264931	45333	6	36	6	3	cellular respiration
0.0289868	287	1	790	166	47	magnesium ion binding
0.0315995	22900	5	179	94	13	electron transport chain
0.0317622	16151	5	179	27	7	nickel ion binding
0.0334005	6826	10	228	37	8	iron ion transport
0.0342199	16742	10	228	4	3	hydroxymethyl-, formyl- and related transferase activity
0.0350754	9090	10	228	4	3	homoserine biosynthetic process homoserine catabolic process
0.0359748	5375	10	228	4	3	copper ion transmembrane transporter activity
0.036241	8863	6	36	9	3	formate dehydrogenase activity
0.0369215	60003	10	228	4	3	copper ion export
0.0379193	10272	10	228	4	3	response to silver ion
0.0389634	16874	10	228	39	8	ligase activity ligase activity, forming carbon-oxygen bonds
0.0389727	6567	10	228	4	3	threonine catabolic process
0.0404871	9073	10	228	15	5	aromatic amino acid family biosynthetic process aromatic amino acid family catabolic process
0.0405596	3924	1	790	16	9	GTPase activity small monomeric GTPase activity ARF small monomeric GTPase activity
0.0415369	8272	10	228	9	4	sulfate transport
0.0433712	5506	6	36	210	9	iron ion binding

## Sheet: c=4
PVALUE	GOTERMNUMBER	COMNUMBER	COMSIZE	GOSIZE	#INCOMMON	DESCRIPTION
1.94135e-08	6935	4	12	22	6	chemotaxis
3.83366e-08	8652	3	136	62	16	cellular amino acid biosynthetic process
3.90059e-08	6526	3	136	13	9	arginine biosynthetic process
7.54359e-07	162	3	136	6	6	tryptophan biosynthetic process protein phosphatase type 1 complex
1.22984e-05	6865	3	136	70	14	amino acid transport
1.33223e-05	16597	3	136	18	8	amino acid binding
0.000885378	6541	3	136	14	6	glutamine metabolic process
0.00105103	15986	2	70	11	5	ATP synthesis coupled proton transport
0.00270909	46961	2	70	7	4	proton-transporting ATPase activity, rotational mechanism
0.00355655	46933	2	70	8	4	hydrogen ion transporting ATP synthase activity, rotational mechanism
0.00377567	103	3	136	6	4	sulfate assimilation
0.00402086	6810	3	136	623	38	transport
0.00406267	105	3	136	11	5	histidine biosynthetic process
0.00424763	9098	3	136	6	4	leucine biosynthetic process
0.0081851	45263	2	70	4	3	proton-transporting ATP synthase complex, coupling factor F(o)
0.0102314	42777	2	70	4	3	plasma membrane ATP synthesis coupled proton transport
0.0133337	5215	3	136	209	18	transporter activity
0.013605	9073	3	136	15	5	aromatic amino acid family biosynthetic process aromatic amino acid family catabolic process
0.017708	6164	3	136	16	5	purine nucleotide biosynthetic process
0.0215553	9088	3	136	4	3	threonine biosynthetic process
0.026239	6221	3	136	10	4	pyrimidine nucleotide biosynthetic process
0.0269616	16829	3	136	81	10	lyase activity
0.0330483	15078	2	70	6	3	hydrogen ion transmembrane transporter activity potassium ion transmembrane transporter activity
